# Supplementary material for: Selection Signatures in Worldwide Sheep Populations
Source: PubMed Central journal article supplement (PMC4134316; doi:10.1371/journal.pone.0103813), 2014-08-15

1 **Selection signatures in worldwide Sheep populations -**  
2 **Supplementary material**

3 Maria-Ines Fariello<sup>1</sup>, Bertrand Servin<sup>1</sup>, Gwenola Tosser-Klopp<sup>1</sup>, Rachel Rupp<sup>1</sup>, Carole Moreno<sup>1</sup>, Magali  
4 SanCristobal<sup>1</sup>, Simon Boitard<sup>3,4,\*</sup>

5 **1 Génétique, Physiologie et Systèmes d'Élevage, INRA & ENVT & ENSAT,**  
6 **Castanet-Tolosan, France**

7 **3 Génétique Animale et Biologie Intégrative, INRA & AgroParisTech, Jouy-en-Josas,**  
8 **France**

9 **4 Origine, Structure et Evolution de la Biodiversité, Museum National d'Histoire**  
10 **Naturelle & EPHE & CNRS, Paris, France**

11 **\* E-mail: Corresponding sboitard@mnhn.fr**

| Candidate Gene | Populations   |
|----------------|---------------|
| BNC2           | COM           |
| KITLG          | COM, EMZ      |
| KIT            | VBS           |
| EDN3           | MOG           |
| MC1R           | SUF, SAB, GAL |
| ASIP           | MER           |
| MITF           | VBS, ERS, BOS |

**Table S1.** List of genes potentially associated with coloration patterns found under selection signatures and the most likely candidate populations for selection.

| group | K  | $\mu$ | $\sigma$ |
|-------|----|-------|----------|
| AFR   | 5  | 1.97  | 0.53     |
| ASI   | 25 | 7.78  | 0.92     |
| CEU   | 10 | 3.41  | 0.62     |
| ITA   | 15 | 2.83  | 0.44     |
| NEU   | 40 | 4.09  | 0.45     |
| SWA   | 10 | 3.28  | 0.55     |
| SWE   | 25 | 3.32  | 0.39     |

**Table S2.** Parameters for the hapFLK genome scan.  $K$  : Number of haplotype clusters used in the LD model for each group, as determined by the fastPHASE cross-validation procedure.  $\mu, \sigma$  mean and standard deviation of the normal distribution used to model the hapFLK neutral distribution

| group | DF | $\overline{FLK}$ |
|-------|----|------------------|
| AFR   | 1  | 0.97             |
| ASI   | 7  | 6.65             |
| CEU   | 3  | 2.91             |
| ITA   | 3  | 2.93             |
| NEU   | 5  | 4.78             |
| SWA   | 3  | 2.92             |
| SWE   | 3  | 2.96             |

**Table S3.** Theoretical number of degrees of freedom (DF) and observed mean of the FLK statistic ( $\overline{FLK}$ ) in each group of populations.

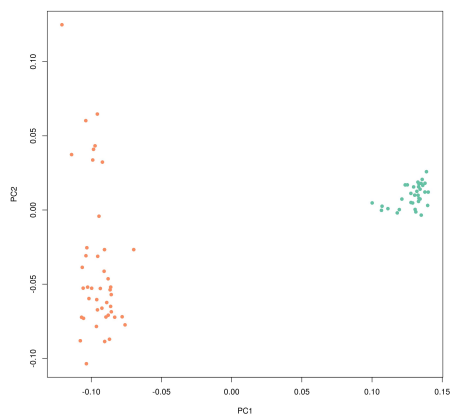

**Figure S1.** Projection of animals from the African group on the first 2 principal components.

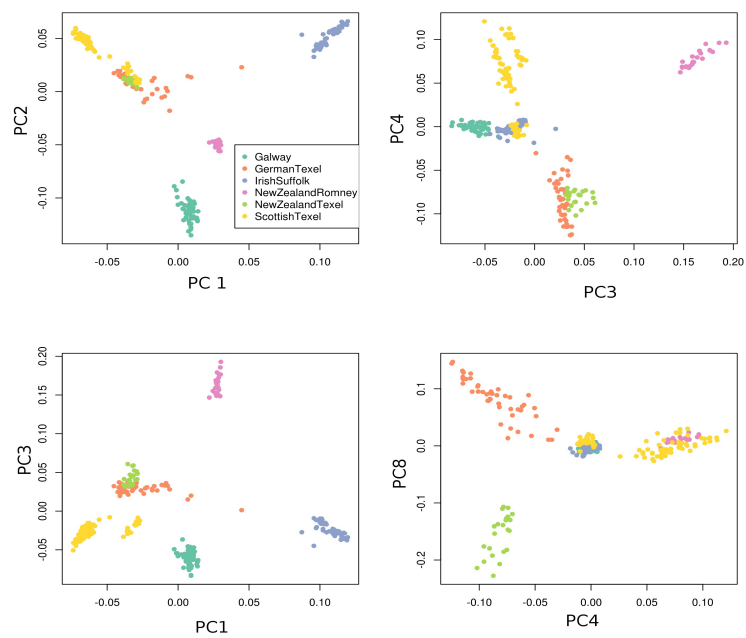

**Figure S2.** Projection of animals from the North European group on the first 8 principal components.

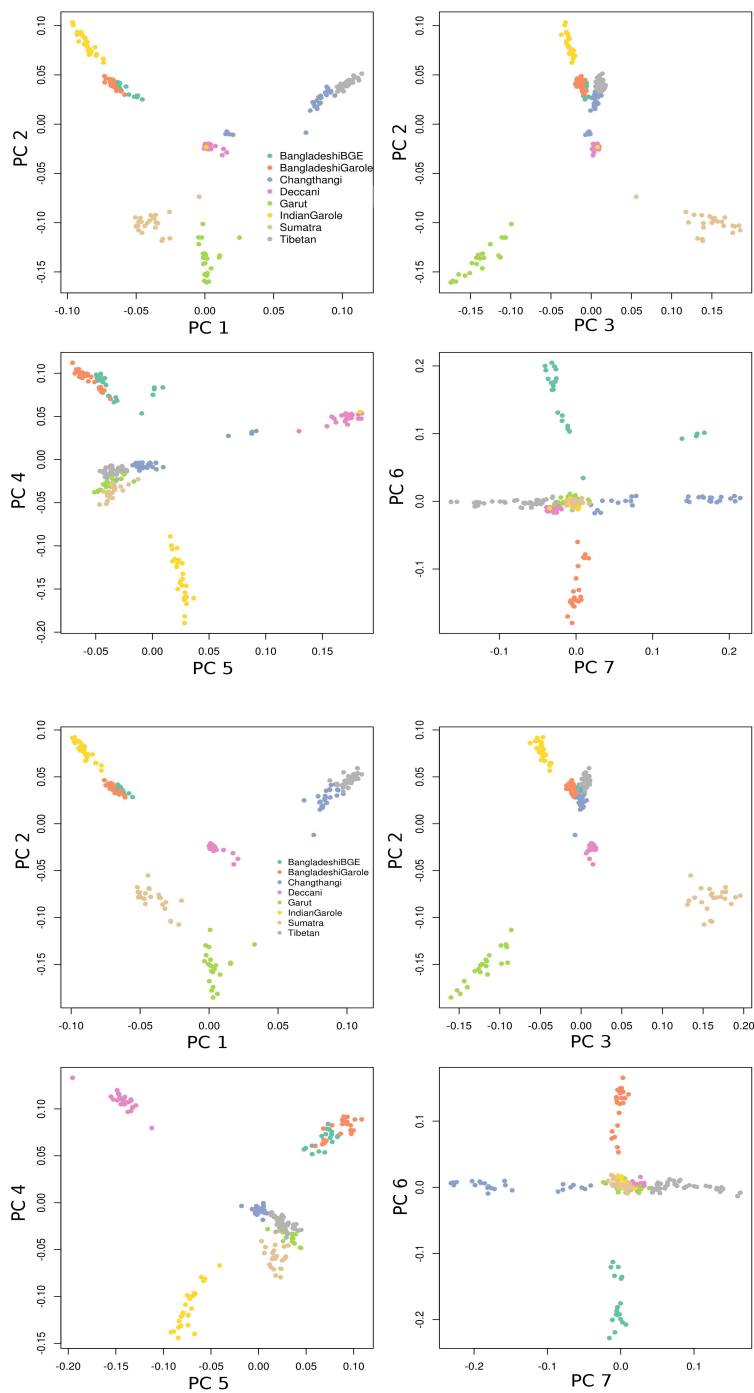

**Figure S3.** Projection of animals from the Asian group on the first 8 principal components, before (top) and after (bottom) correction. One Indian Garole animal located in the Deccani cluster, was attributed to this breed. Five Bangladeshi BGE animals clustering away from the rest of the breed were removed. Four Changthangi animals, which clustered away from the rest of the breed and appeared admixed with the Deccani breed, were removed. One outlier Sumatra animal was also removed.

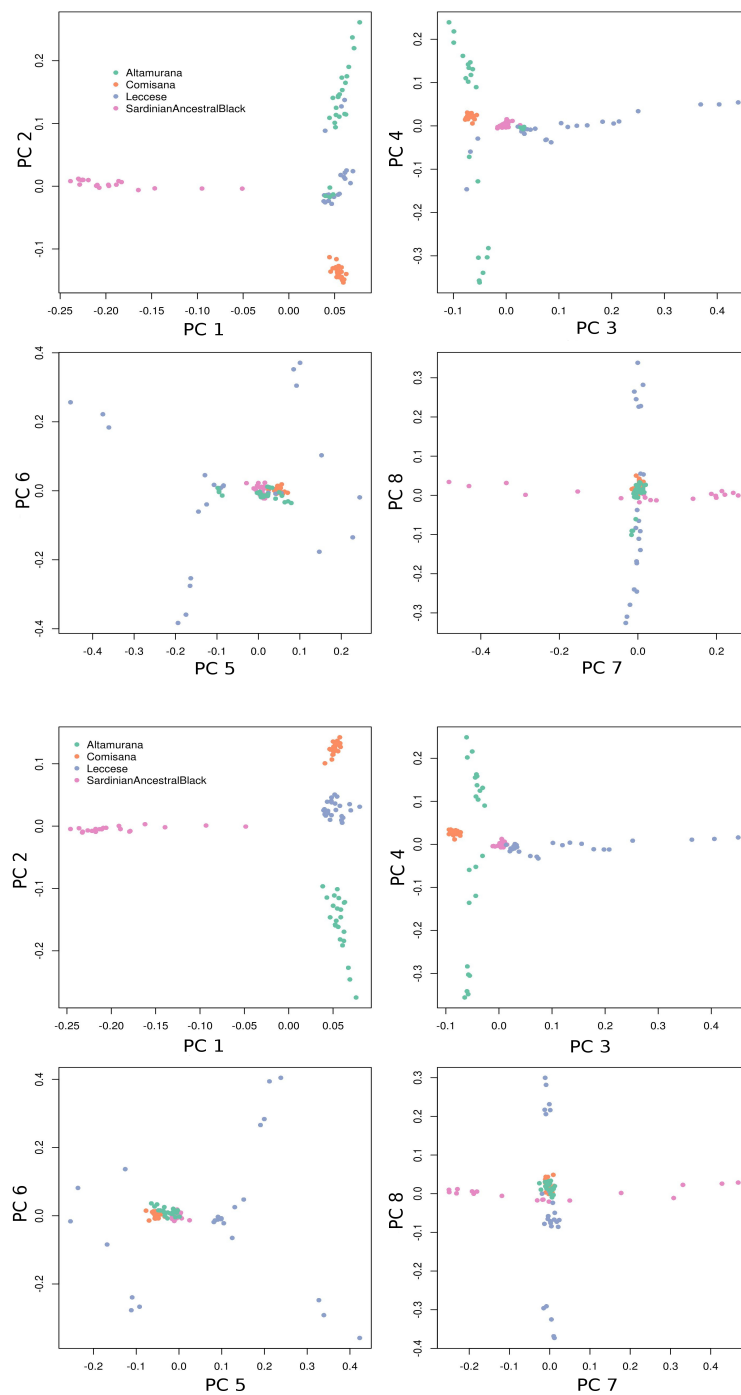

**Figure S4.** Projection of animals from the Italian group on the first 8 principal components, before (top) and after (bottom) correction. Four Altamurana animals located in the Lecceese cluster were attributed to the Lecceese breed. Similarly, three Lecceese animals located in the Altamurana cluster was attributed to the Altamurana cluster.

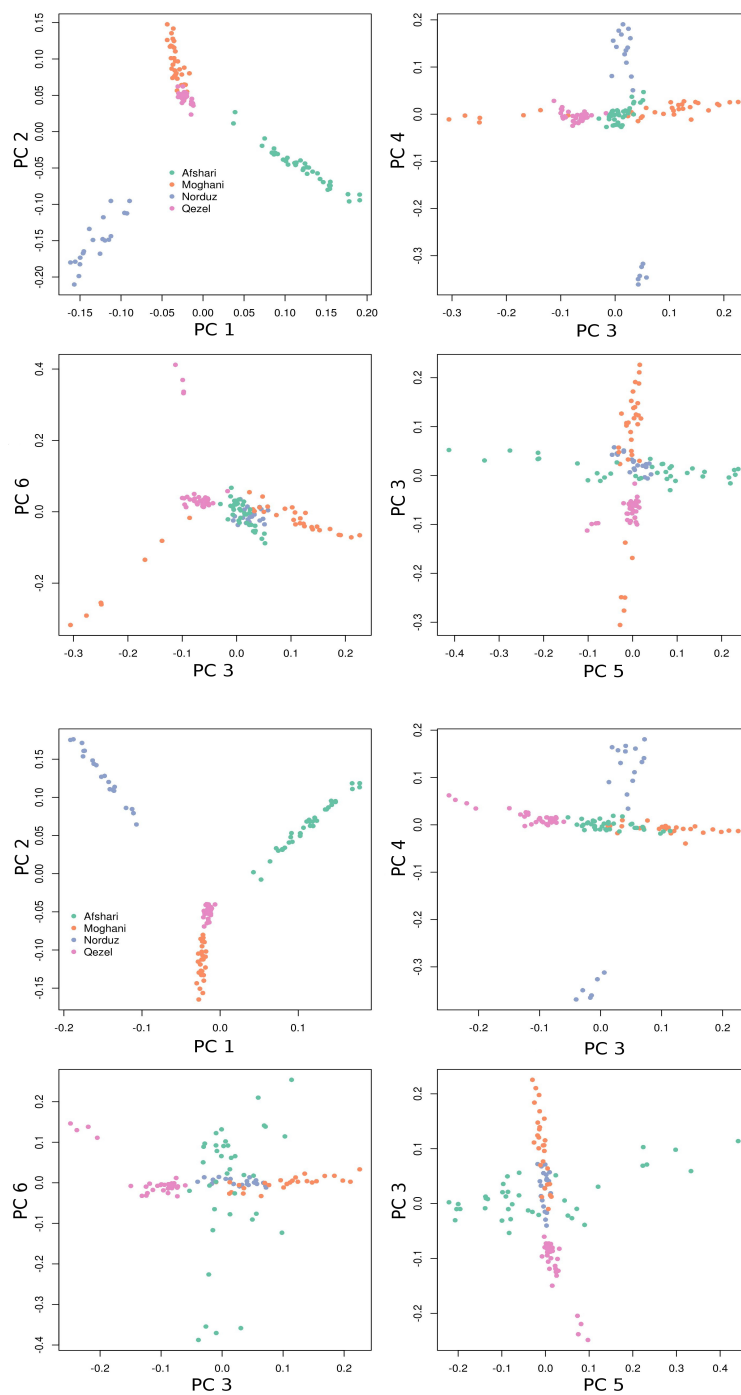

**Figure S5.** Projection of animals from the South West Asian group on the first 8 principal components, before (top) and after (bottom) correction. Seven Moghani animals clustering away from the rest of the breed, and possibly admixed with the Qezel breed, were removed.

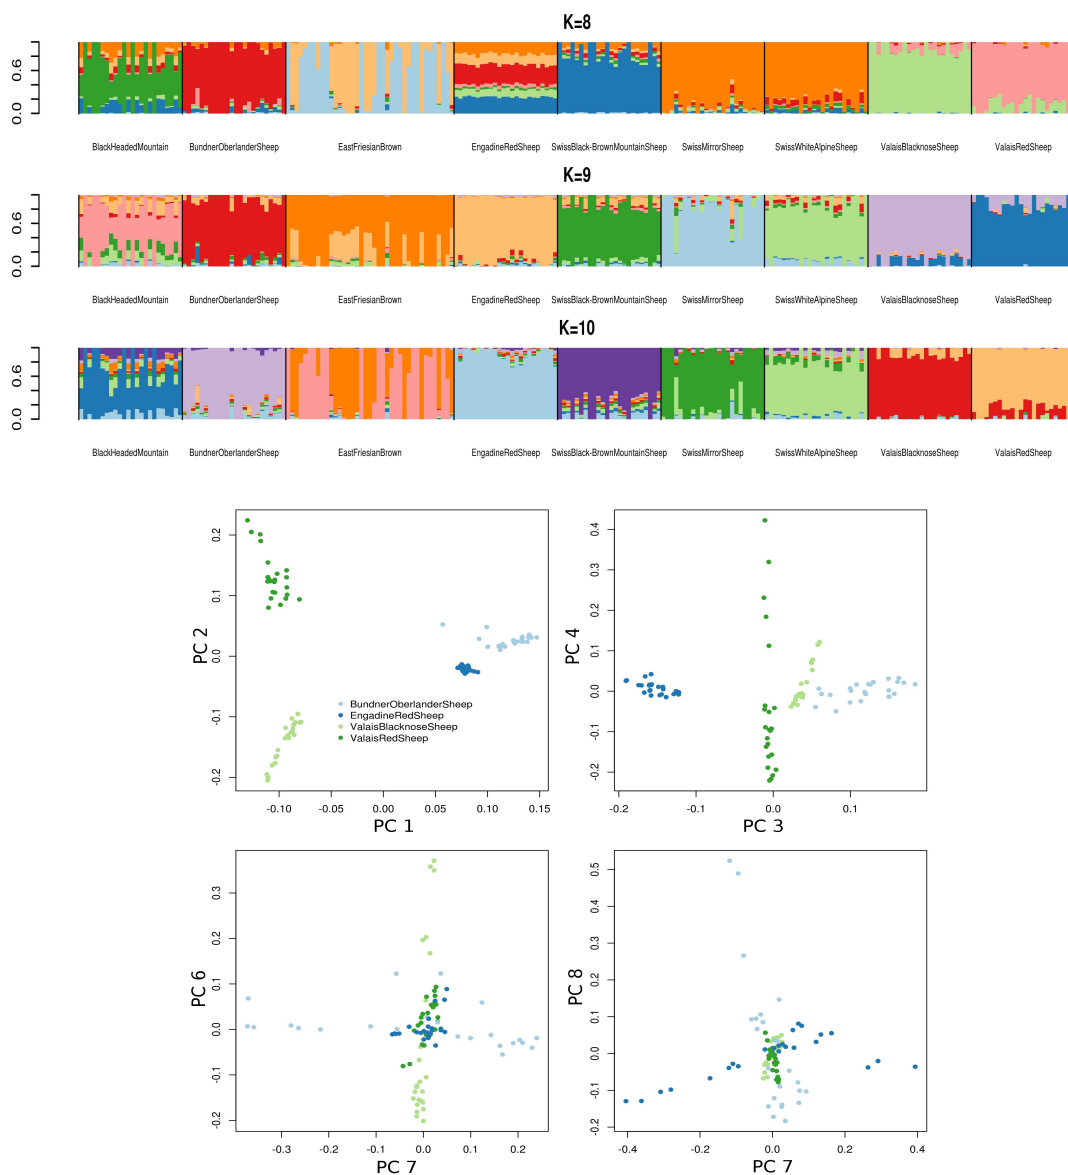

**Figure S6.** Admixture analysis for animals of the Central European group (top), and projection of the selected animals on the first 8 principal components (bottom). Three breeds (Swiss Mirror Sheep, Swiss Alpine White Sheep and Swiss Black-Brown Mountain Sheep) were reported as admixed breeds in [1] and were consequently removed, although they appeared relatively homogeneous in the admixture analysis. Two further breeds (East Friesian Brown and Black Headed Mountain) were removed based on the admixture analysis.



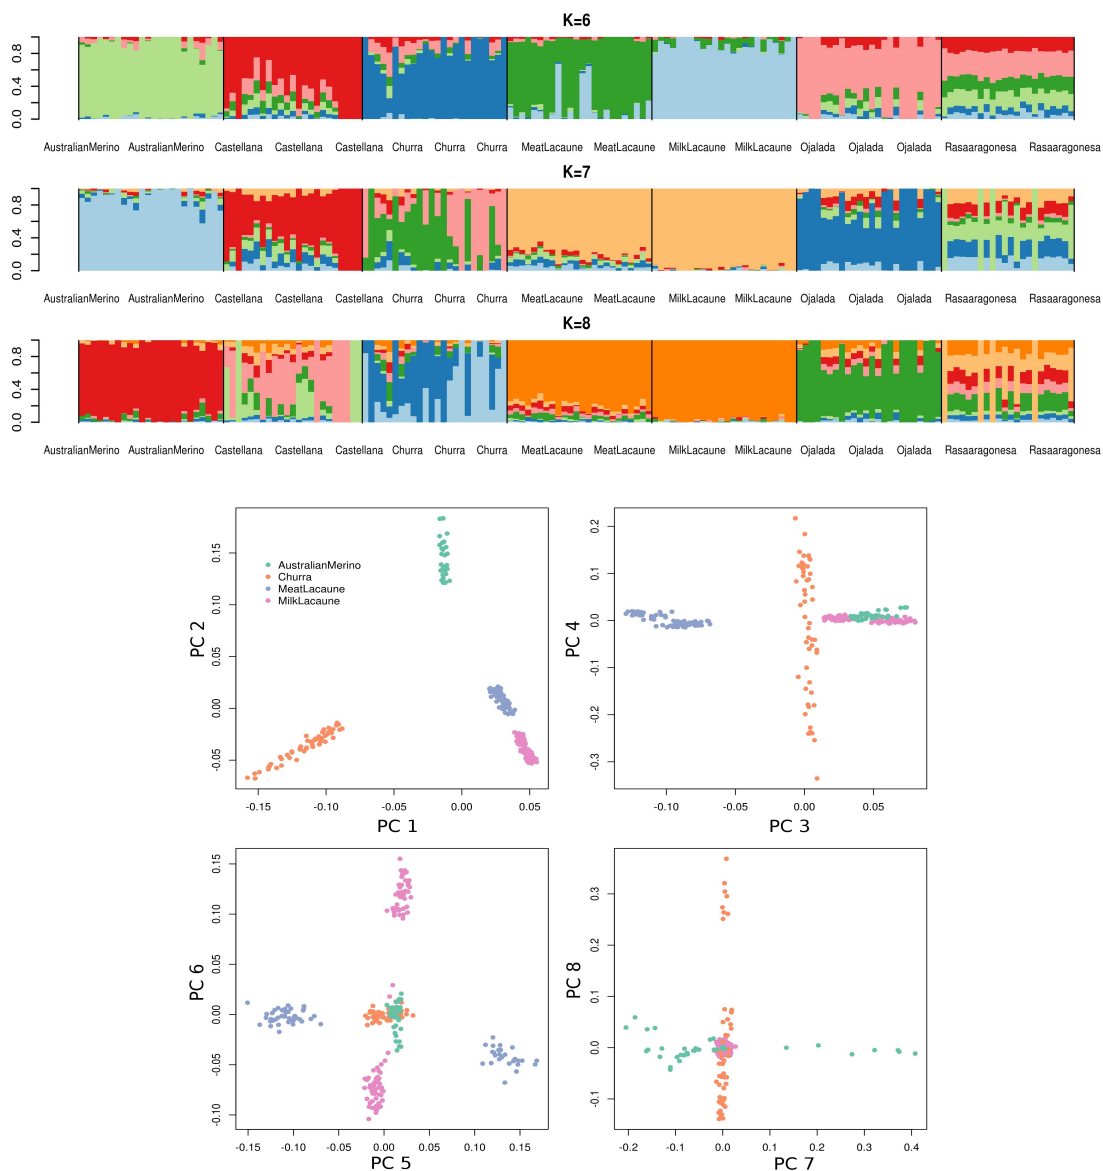

**Figure S7.** Admixture analysis for animals of the South West European group (top), and projection of the selected animals on the first 8 principal components (bottom). For the admixture analysis, a subset of 24 animals was sampled at random within each breed in order to obtain balanced sample sizes. Three breeds (Castellana, Ojalada and Rasaaragonesa) were removed based on the admixture analysis, as they were clearly admixed. Historical records concerning those 3 breeds are ambiguous, some of them reporting that they may result from a cross between Merino and Churra animals. The Churra breed also looked admixed in this analysis, but this was no longer the case after removing the three other problematic breeds.

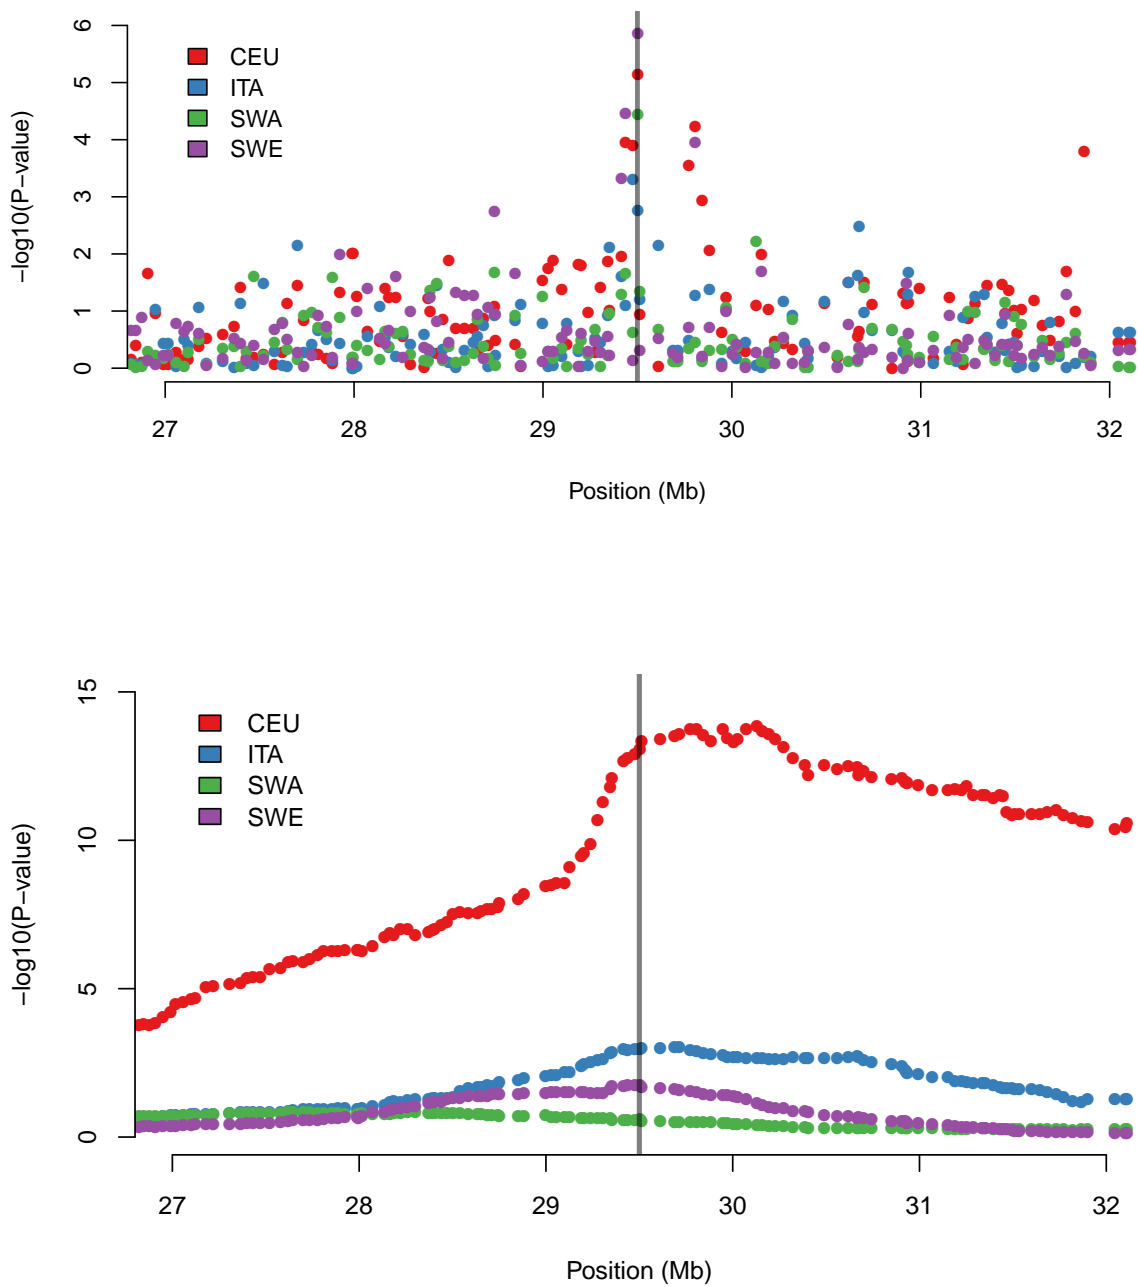

Figure S8. FLK (top) and hapFLK (bottom) p-values in the region of RXFP2. The position of RXFP2 is indicated by the vertical gray line.

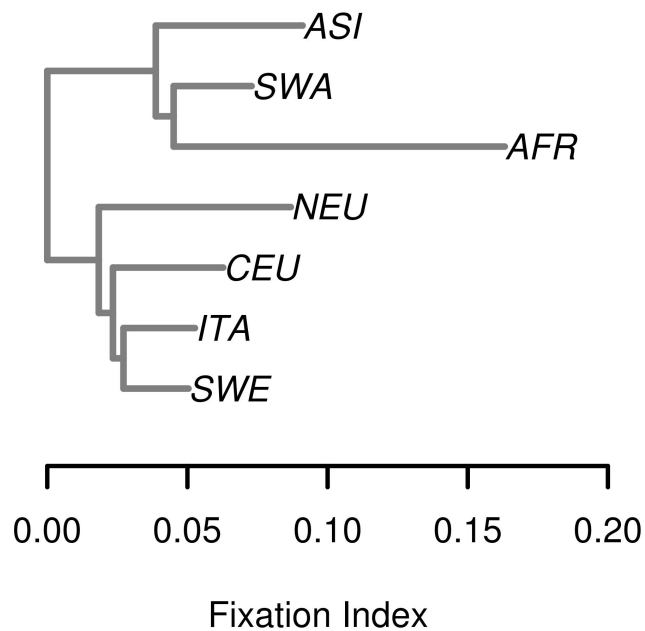

**Figure S9.** Phylogenetic tree of the ancestral populations of geographical groups.

## 12 References

- 13 1. Kijas JW, Lenstra JA, Hayes B, Boitard S, Porto Neto LR, et al. (2012) Genome-wide analysis of  
14 the world's sheep breeds reveals high levels of historic mixture and strong recent selection. PLoS  
15 Biol 10: e1001258.

**16 Text S1. FLK and hapFLK genome scans within groups of populations**

17 For each population group, we show, in this order

- 18 1. histogram of the observed FLK distribution, and corresponding theoretical  $\chi^2$  distribution
- 19 2. the FLK p-value distribution
- 20 3. histogram of the hapFLK distribution and corresponding estimated normal distribution (see details  
21 in Methods)
- 22 4. the hapFLK p-value distribution
- 23 5. Manhattan plot of the FLK p-values
- 24 6. Manhattan plot of the hapFLK p-values

### FLK distribution for group AFR

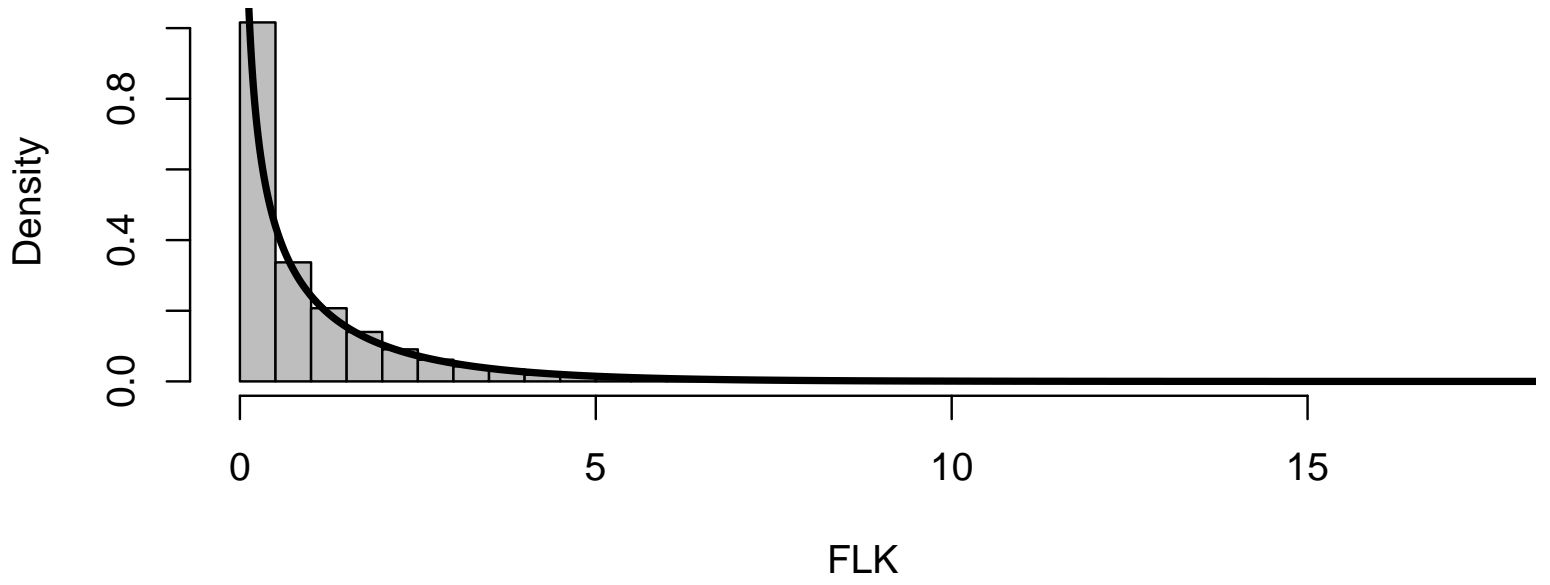

### P-value distribution for group AFR

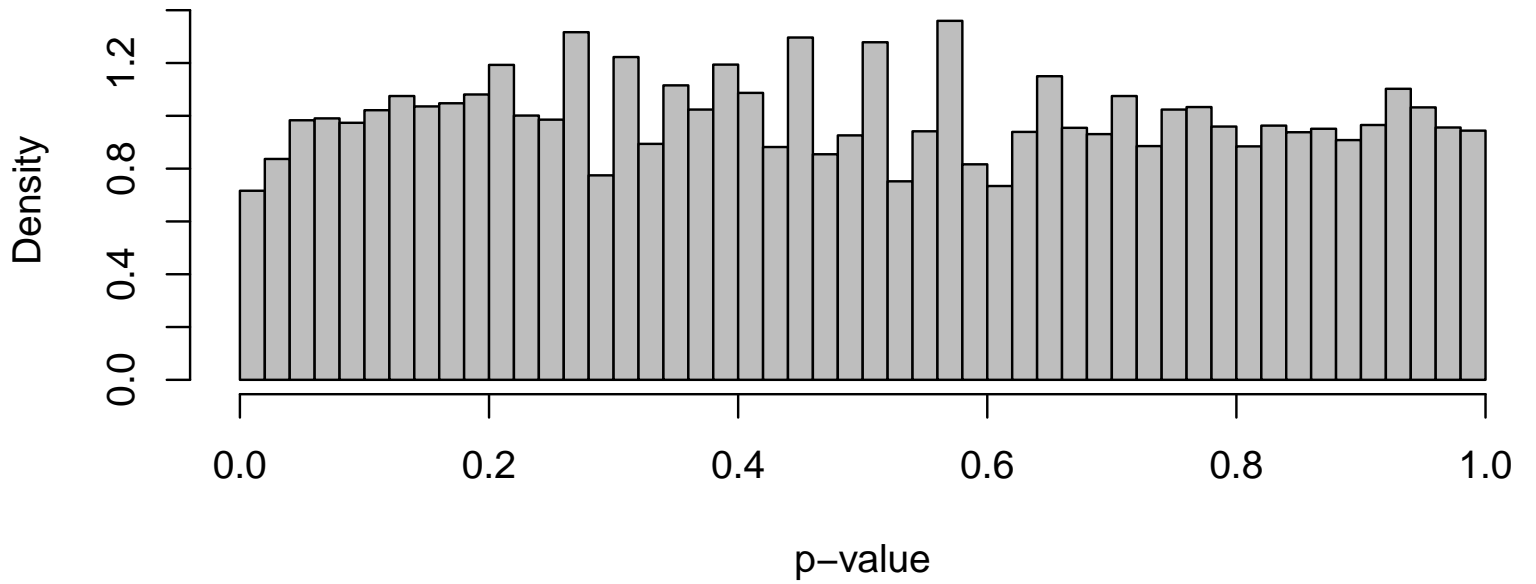

### hapFLK distribution for group AFR

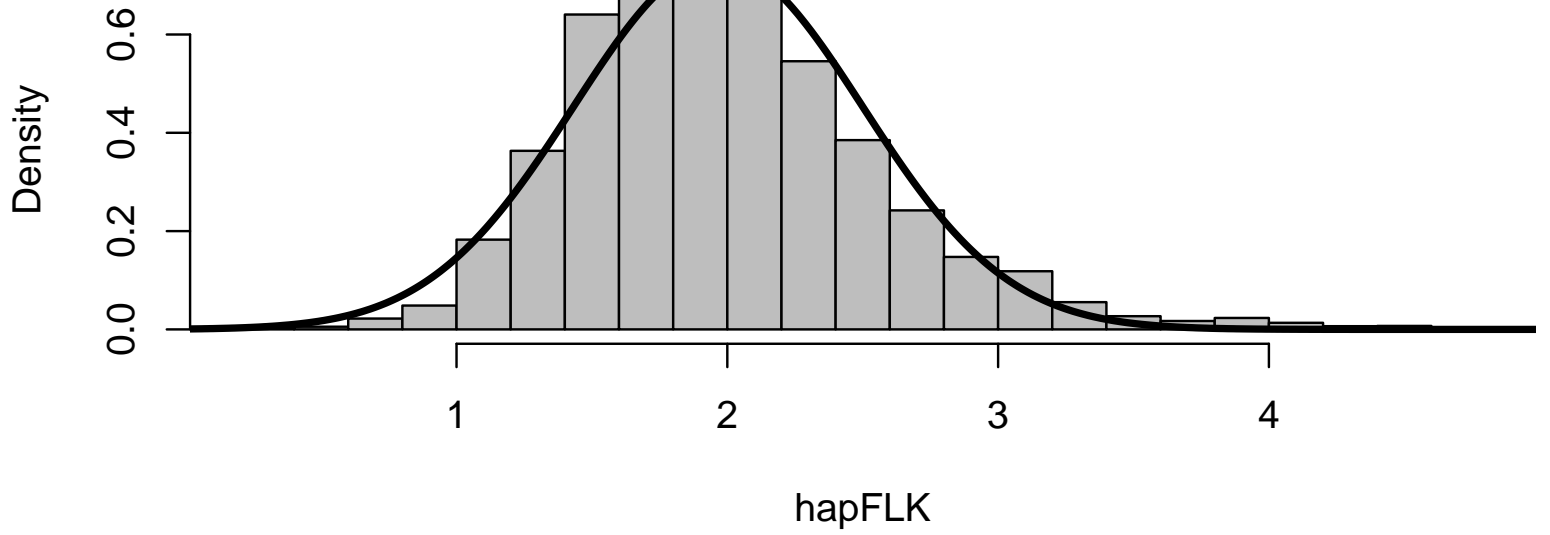

### P-value distribution for group AFR

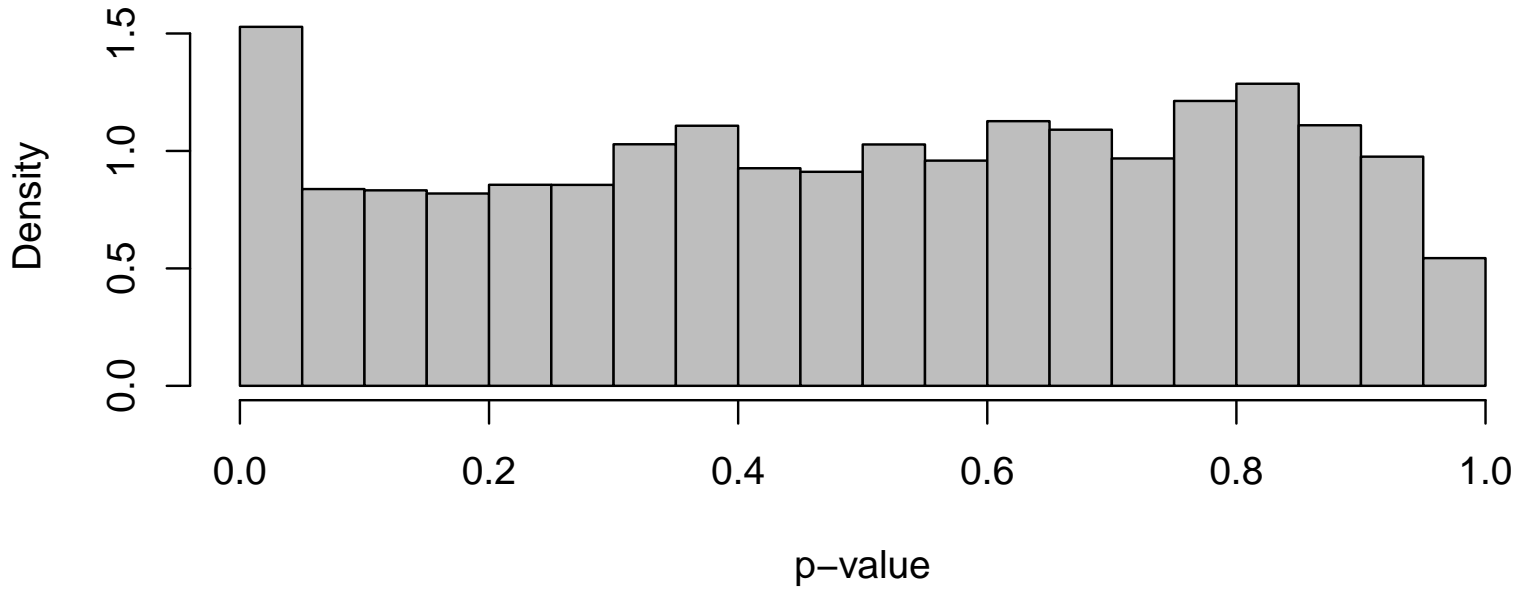

### FLK genome scan for group AFR

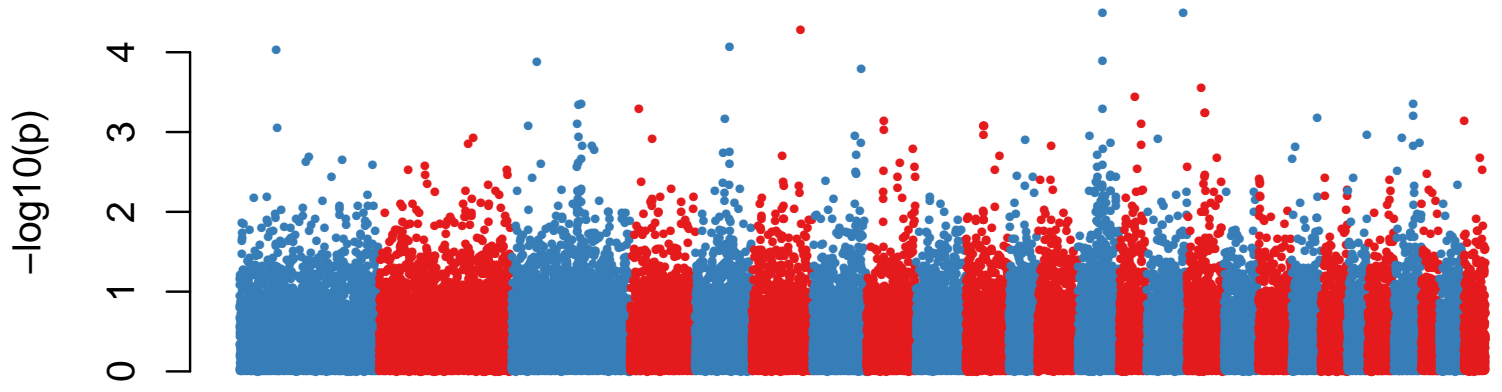

### hapFLK genome scan for group AFR

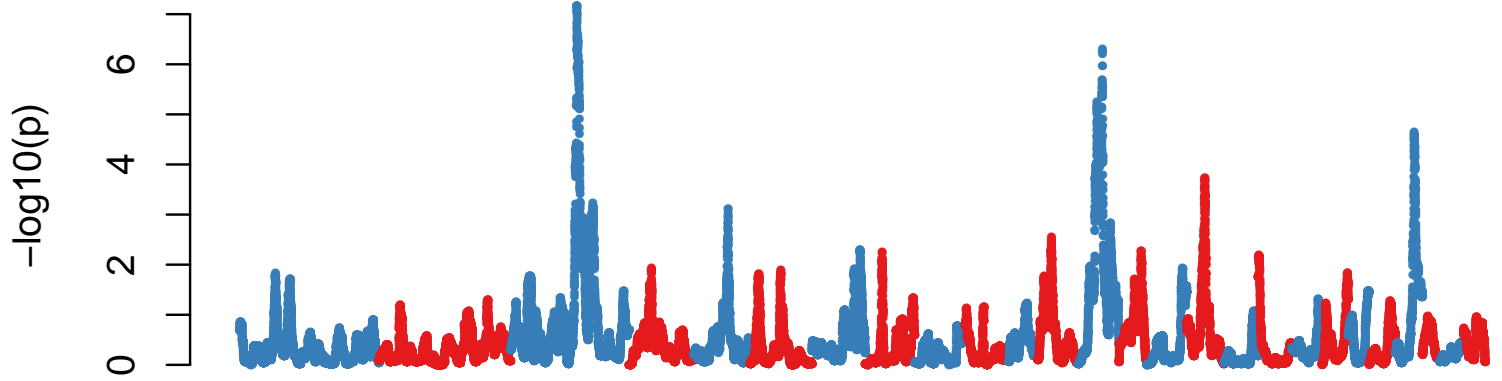

### FLK distribution for group ASI

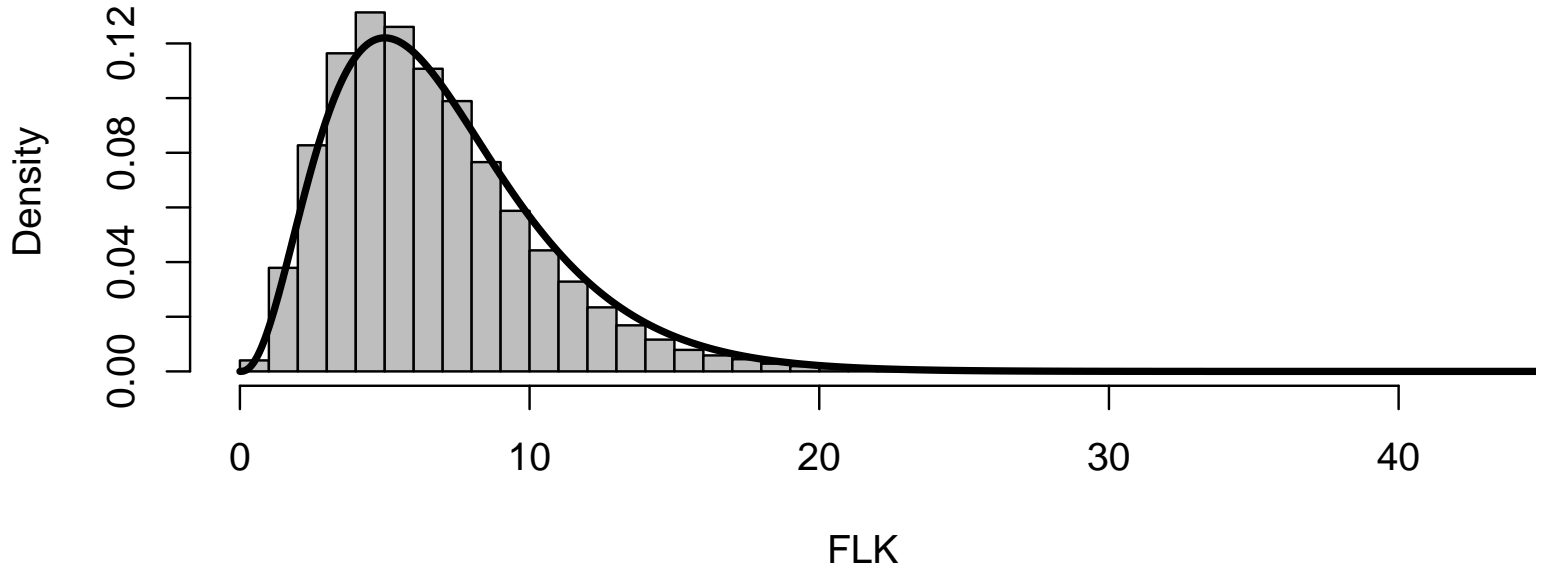

### P-value distribution for group ASI

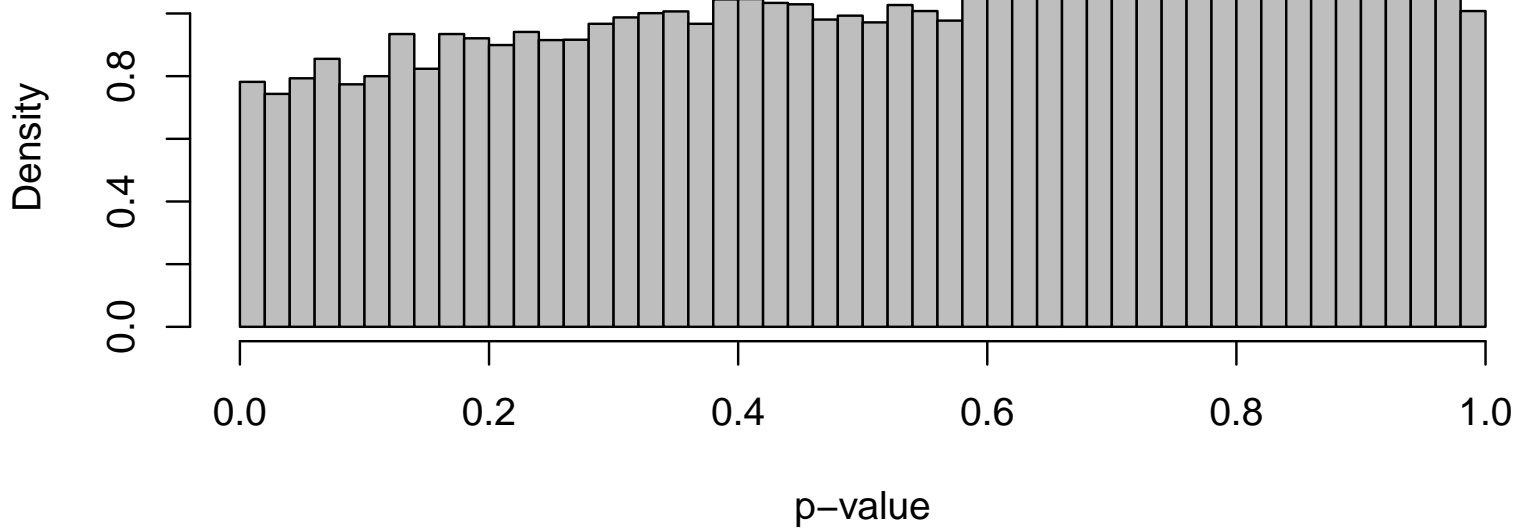



### hapFLK distribution for group ASI

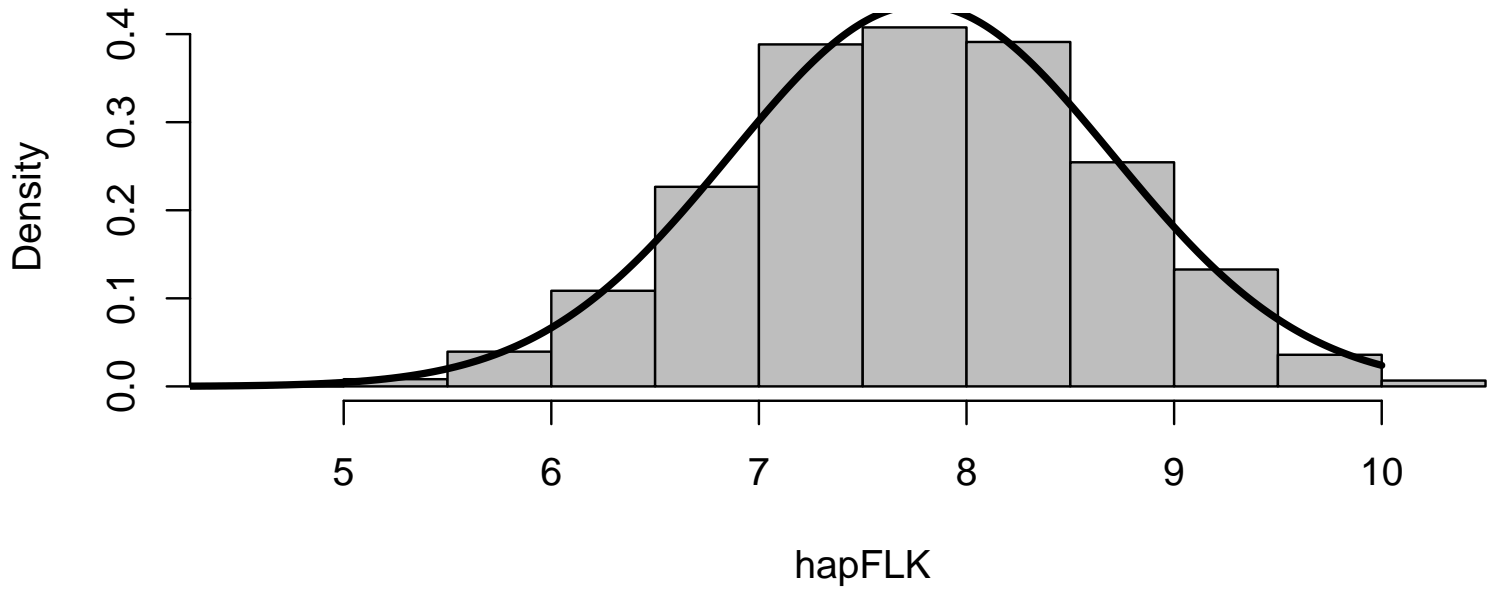

### P-value distribution for group ASI

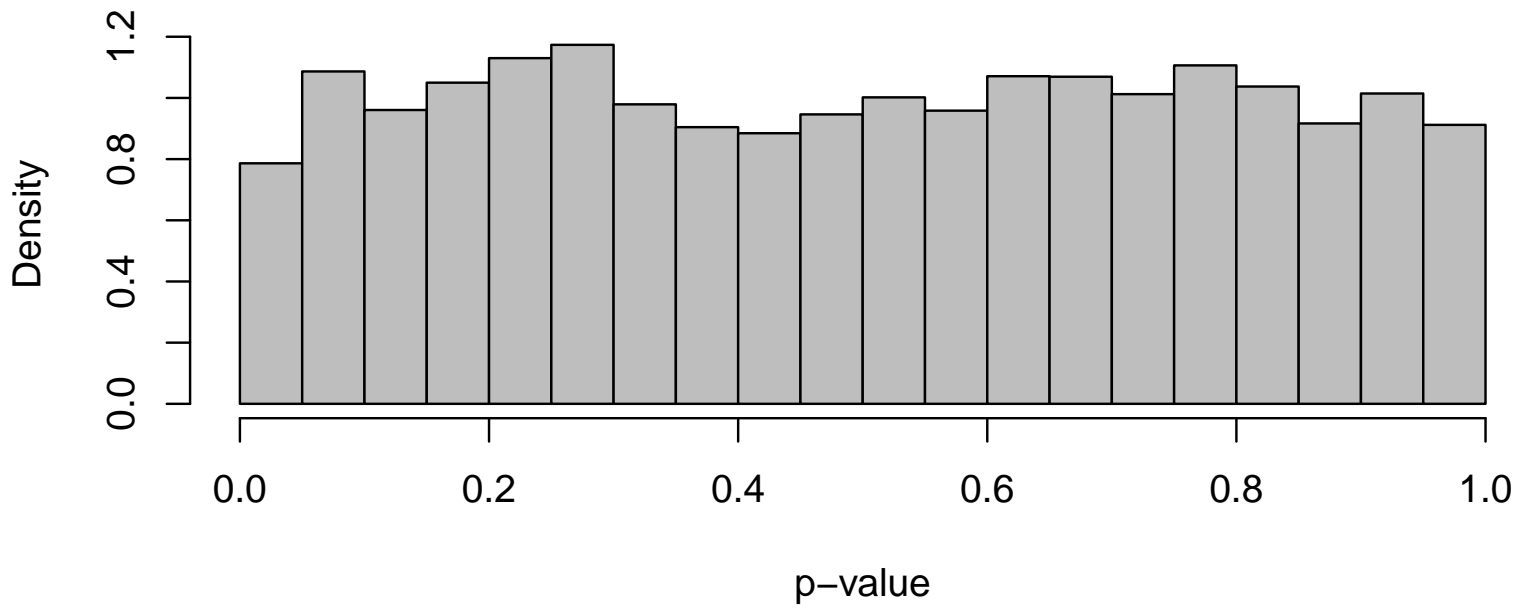

### FLK genome scan for group ASI

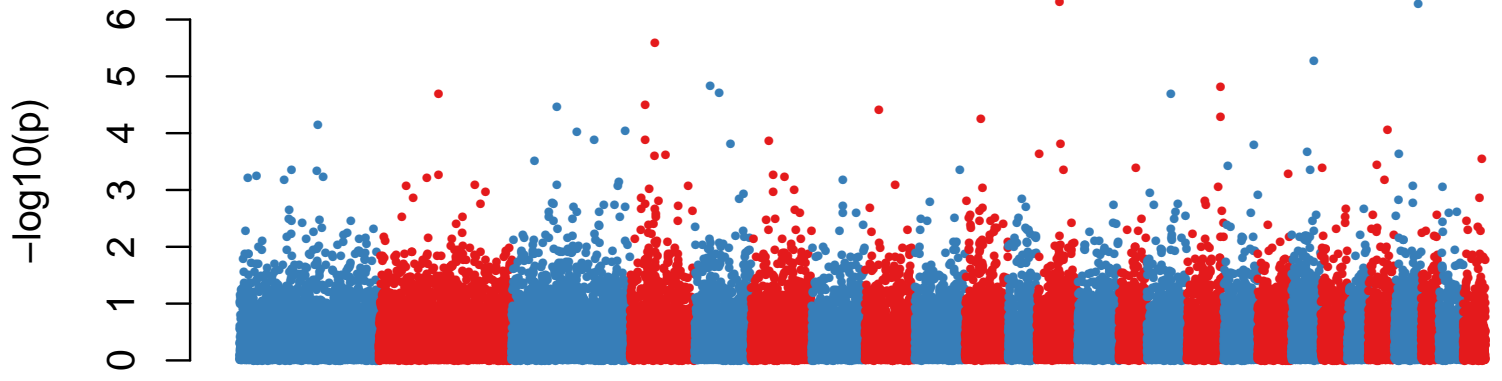

### hapFLK genome scan for group ASI

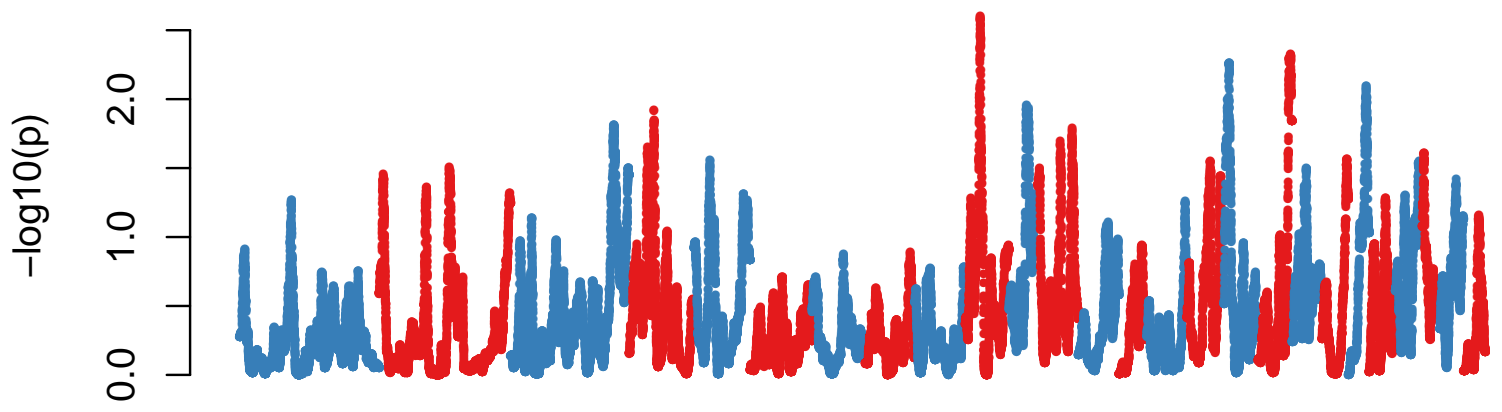

### FLK distribution for group CEU

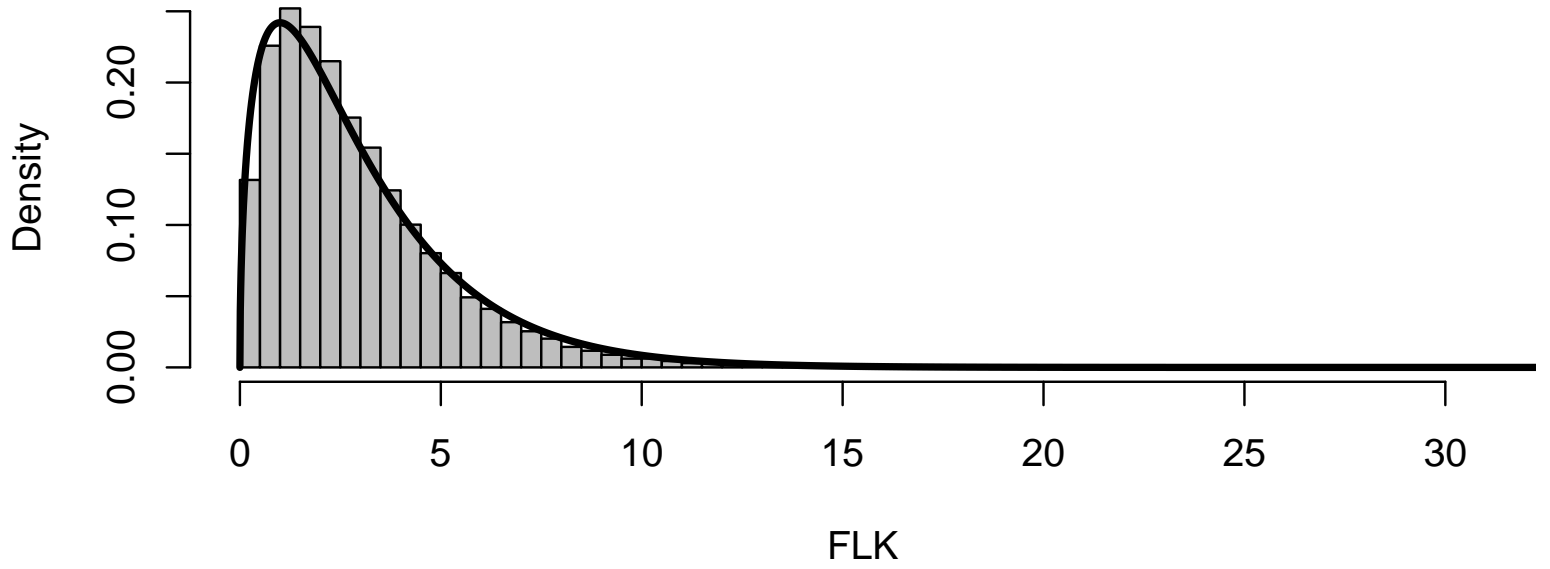

### P-value distribution for group CEU

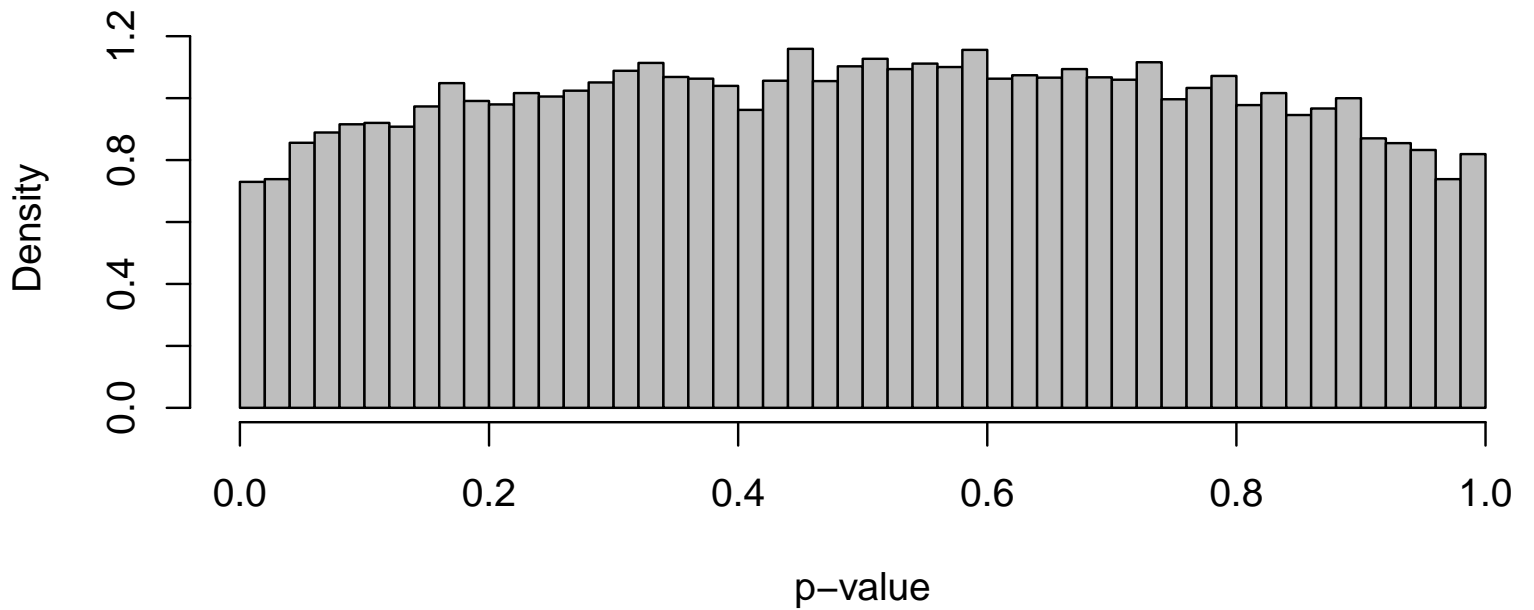

### hapFLK distribution for group CEU

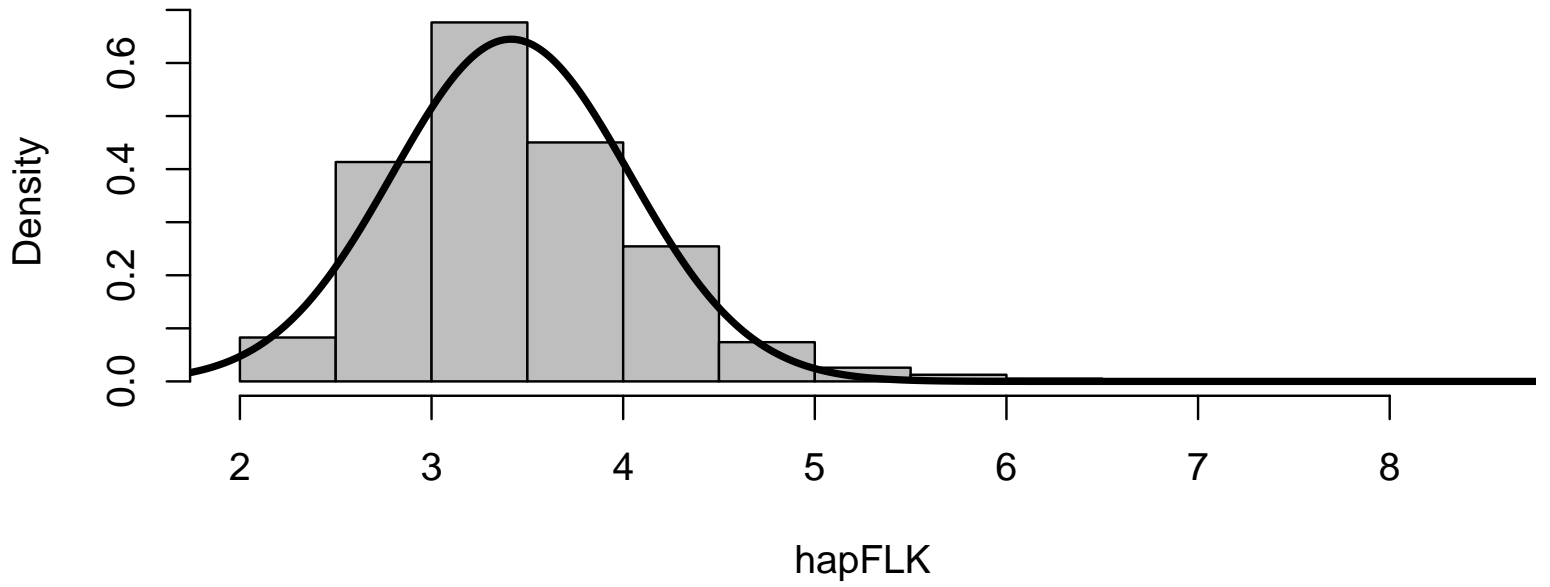

### P-value distribution for group CEU

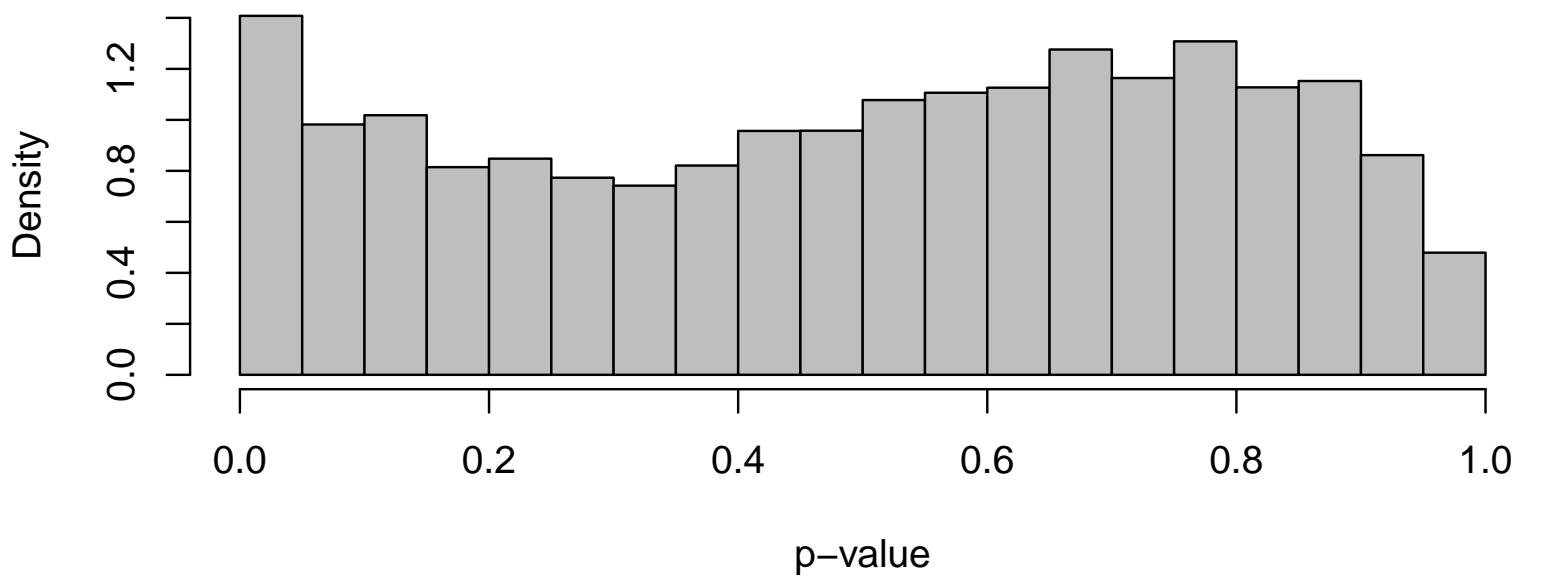

### FLK genome scan for group CEU

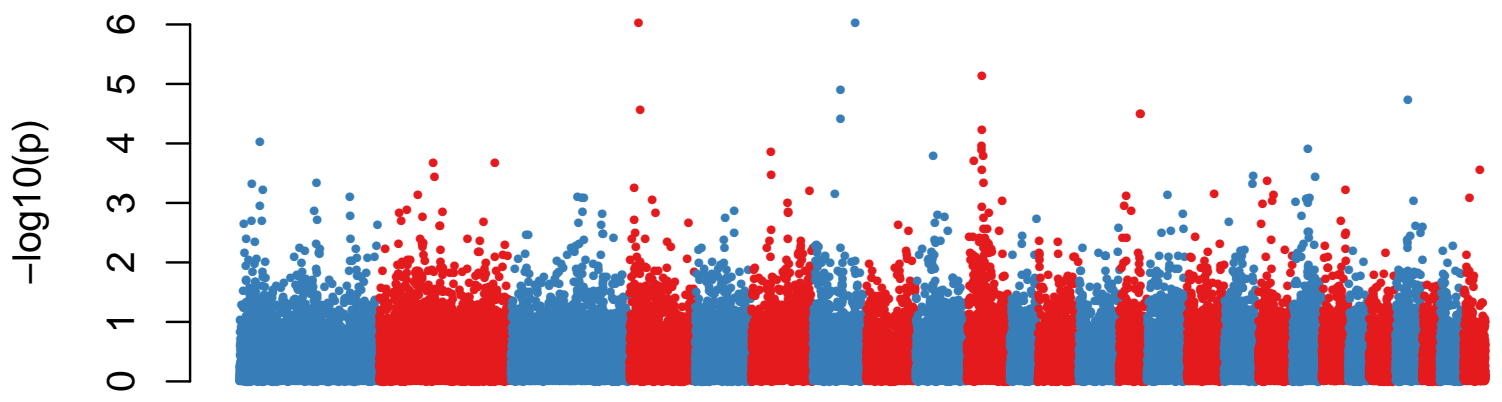

### hapFLK genome scan for group CEU

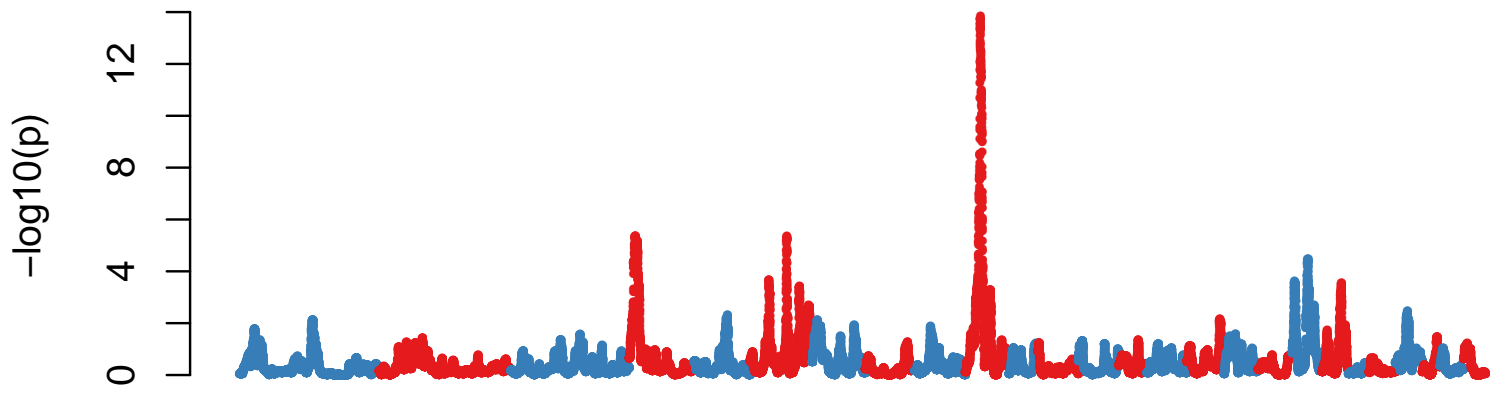

### FLK distribution for group ITA

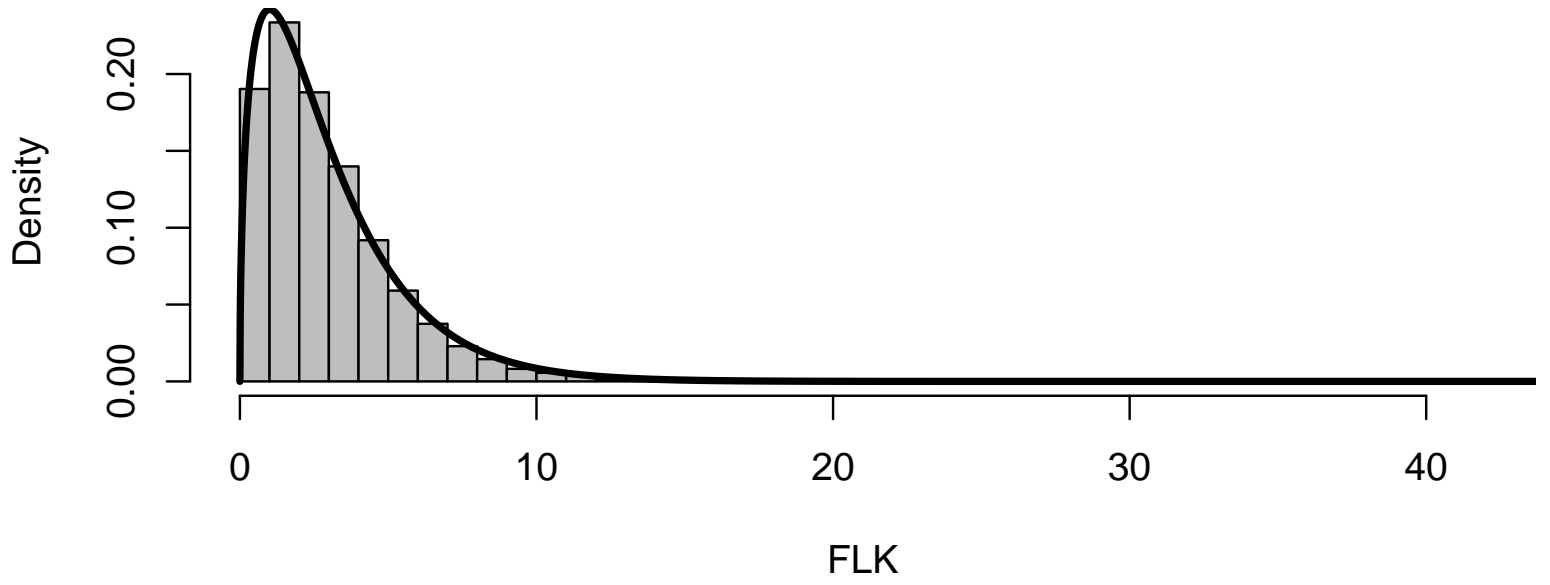

### P-value distribution for group ITA

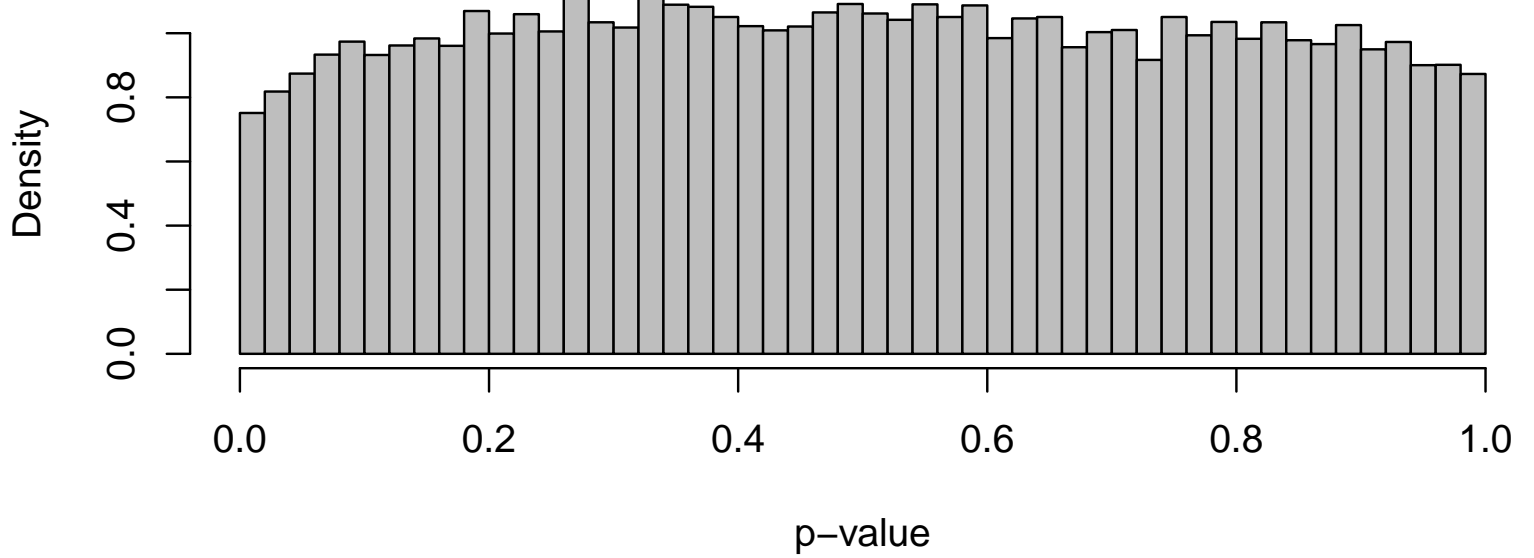

### hapFLK distribution for group ITA

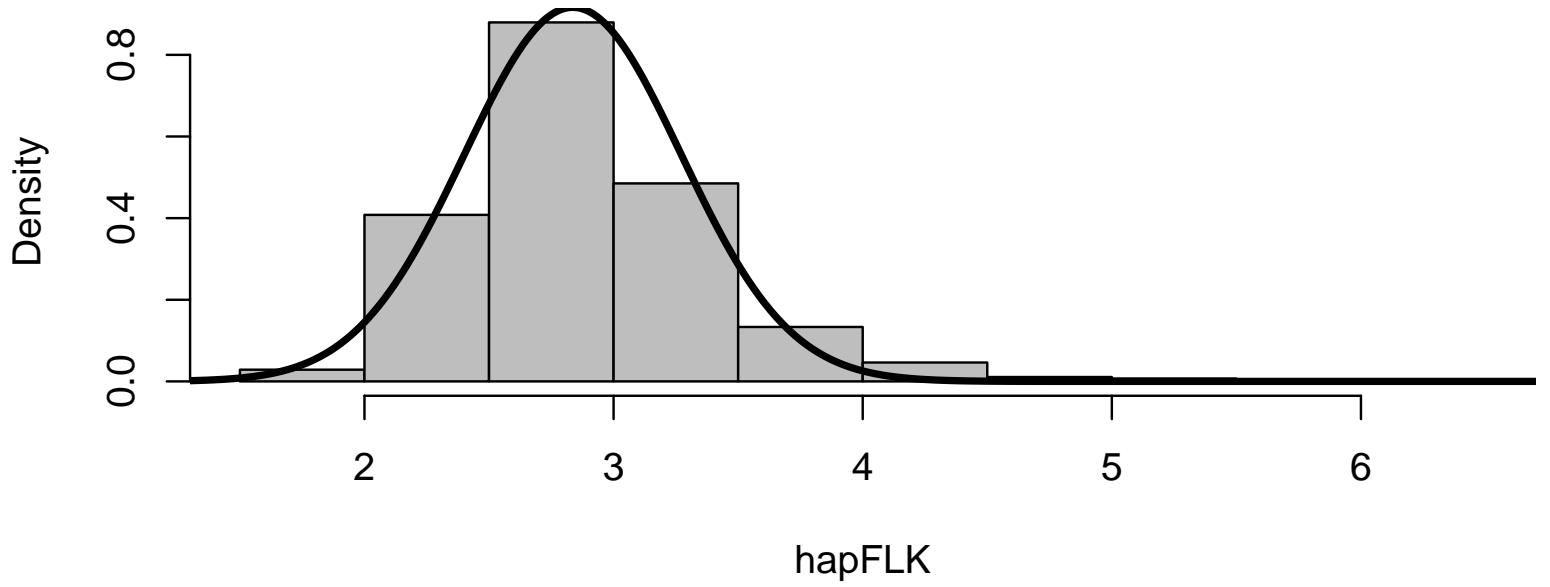

### P-value distribution for group ITA

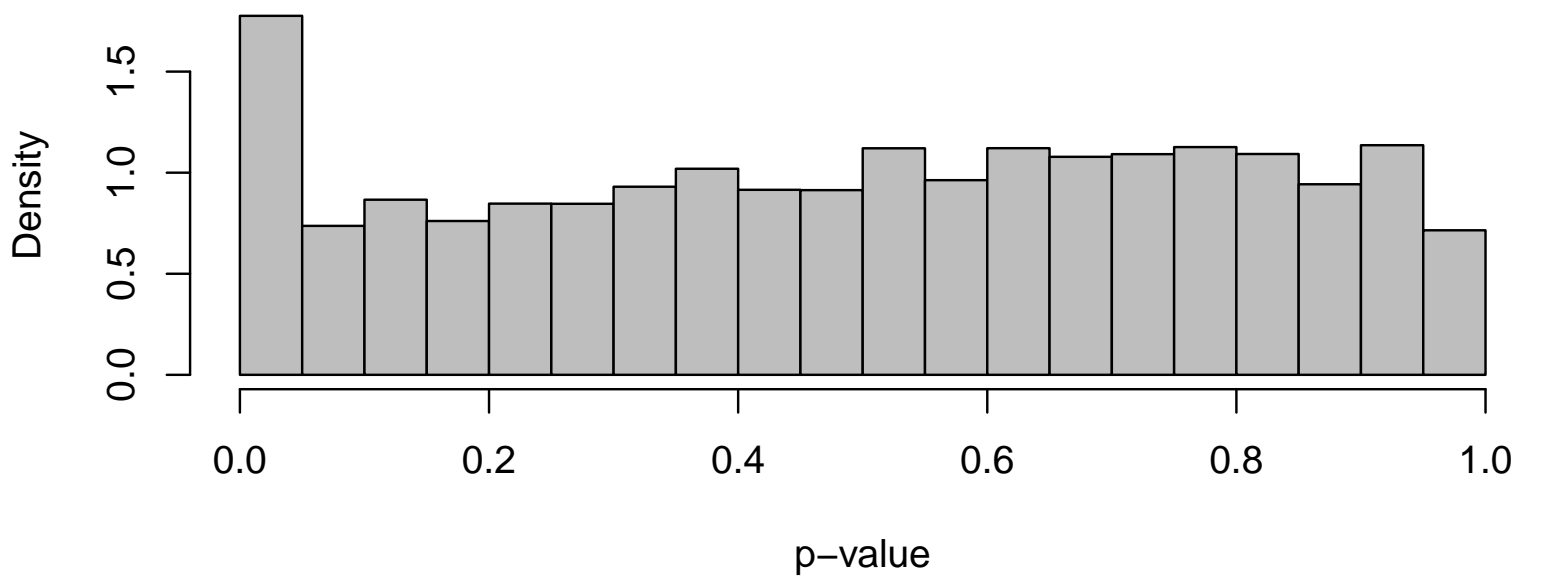

### FLK genome scan for group ITA

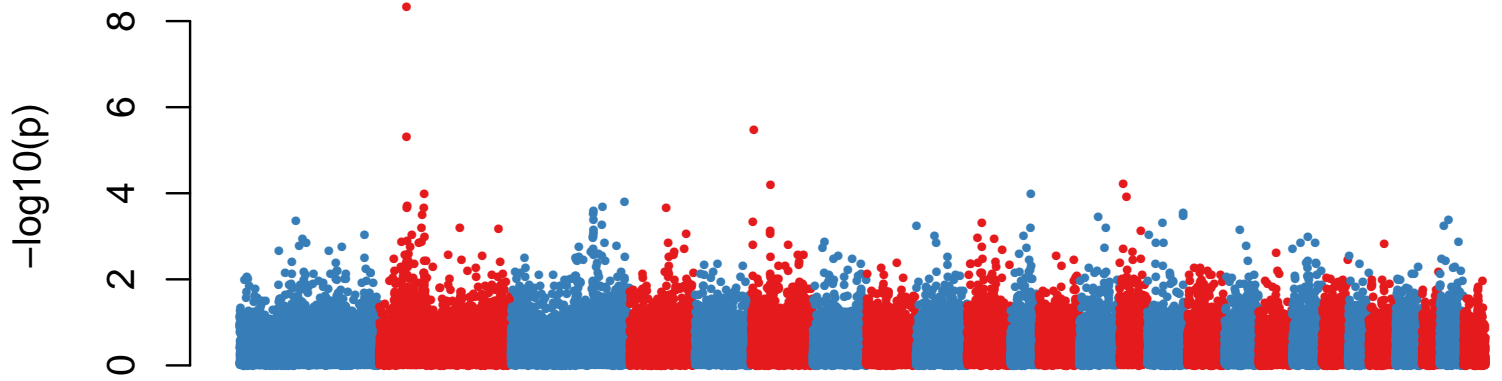

### hapFLK genome scan for group ITA

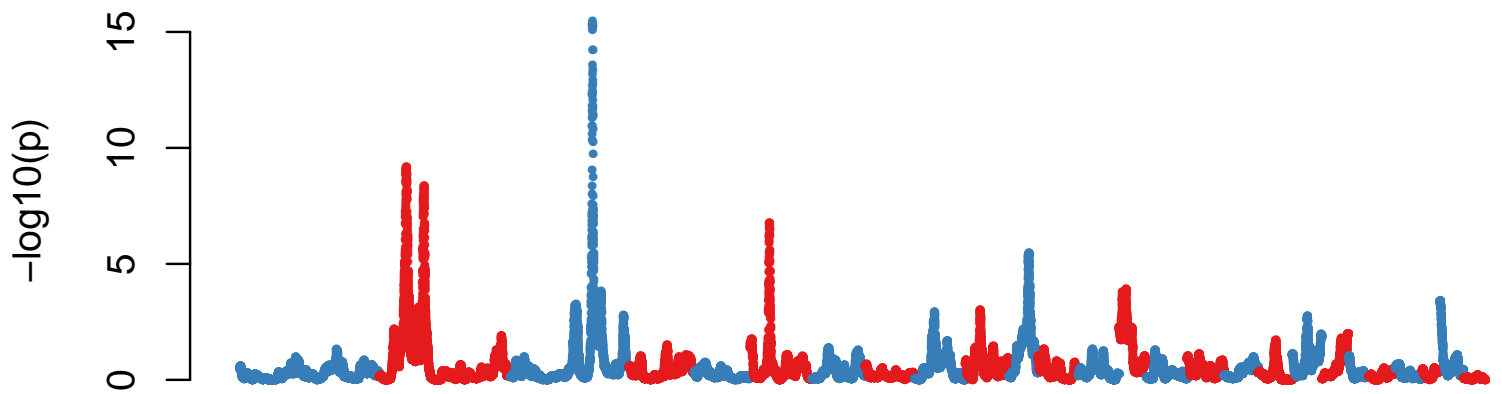



### FLK distribution for group NEU

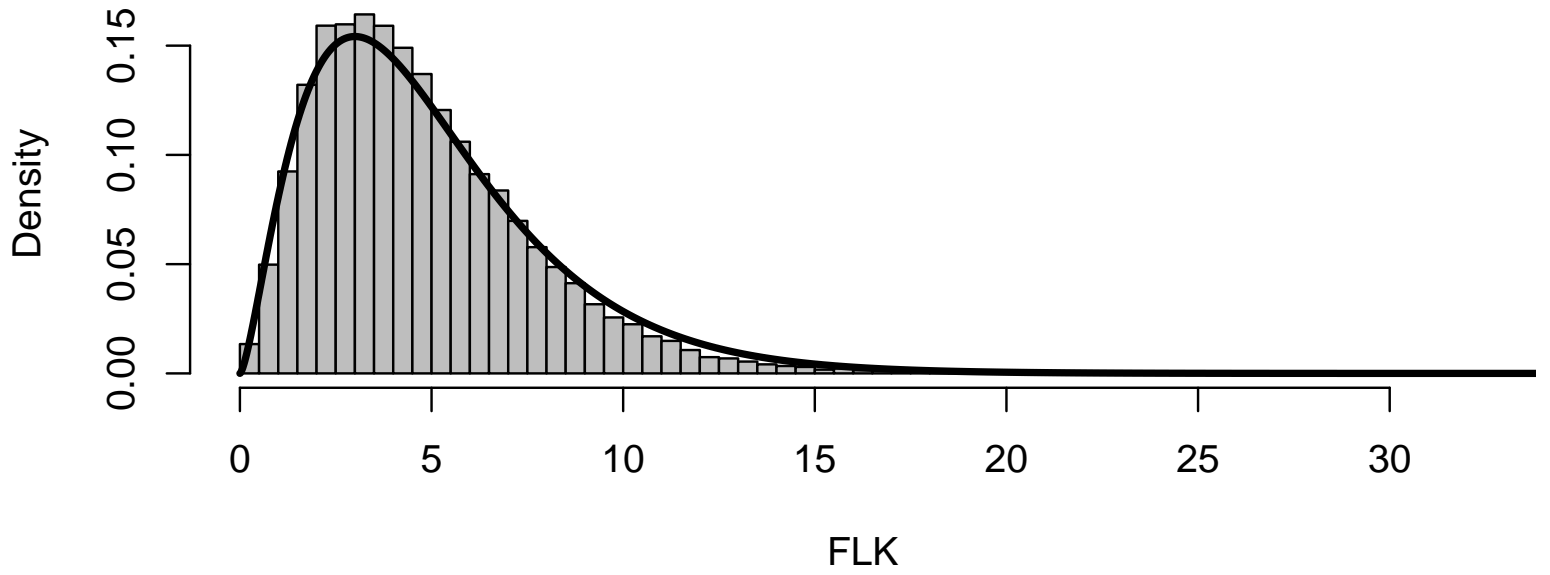

### P-value distribution for group NEU

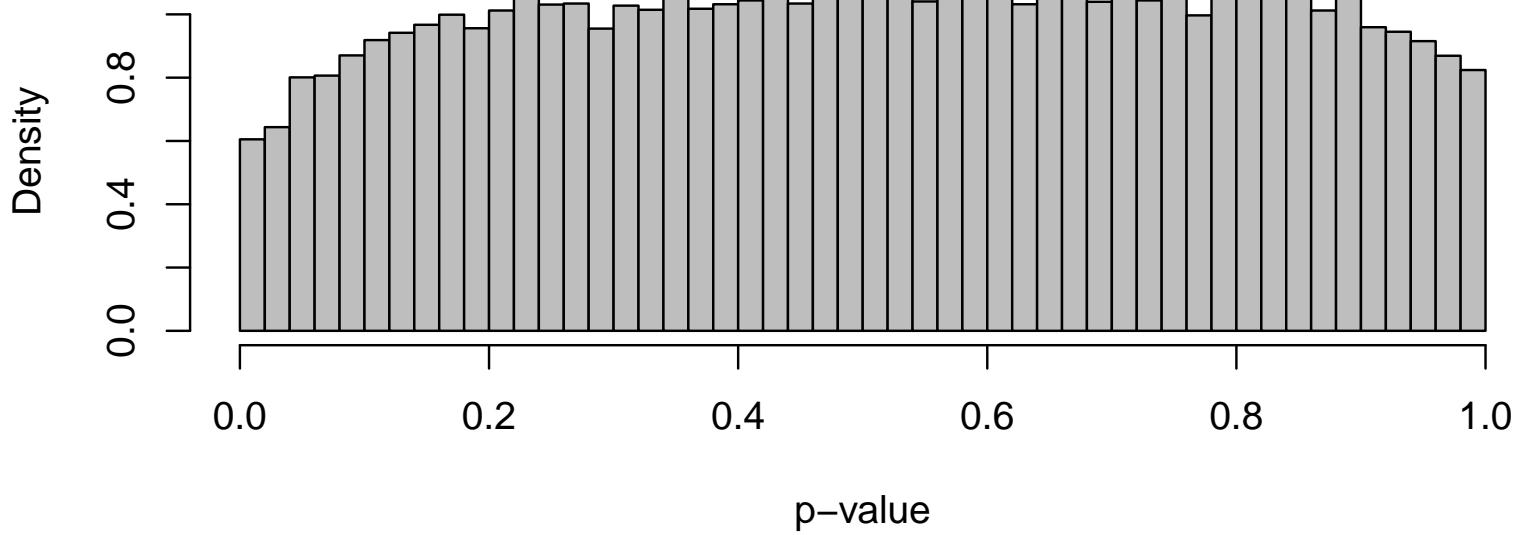

### hapFLK distribution for group NEU

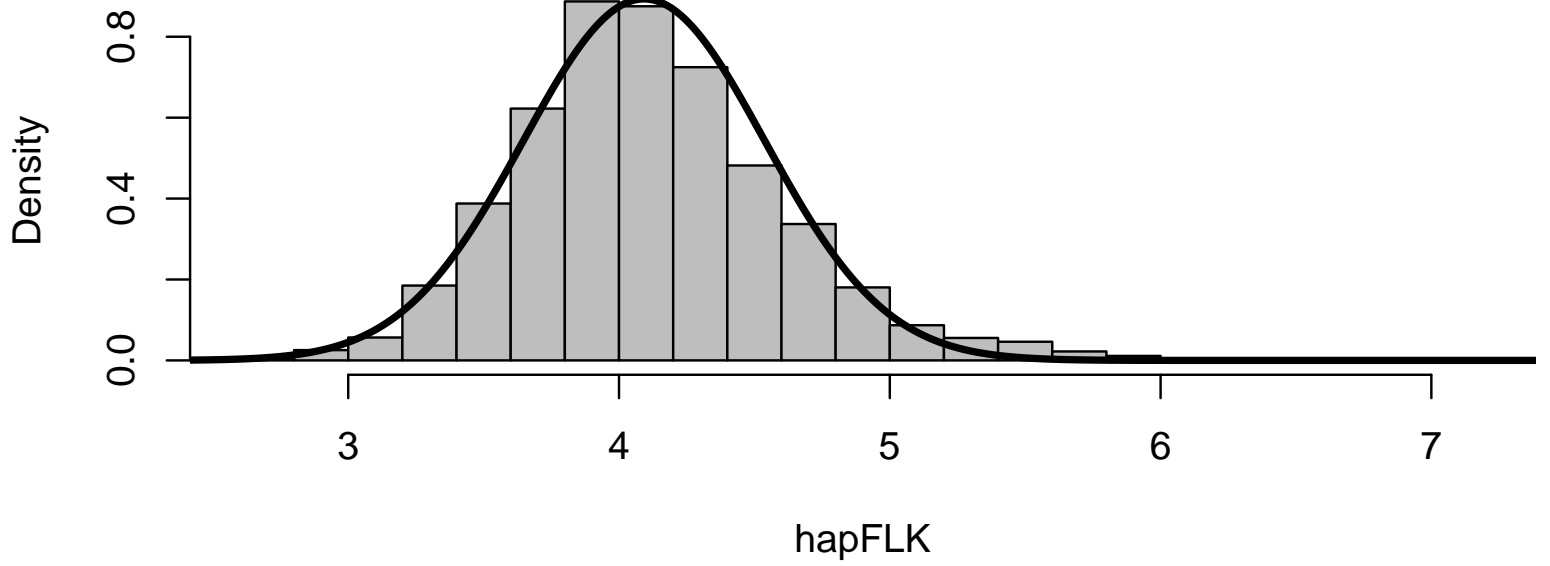

### P-value distribution for group NEU

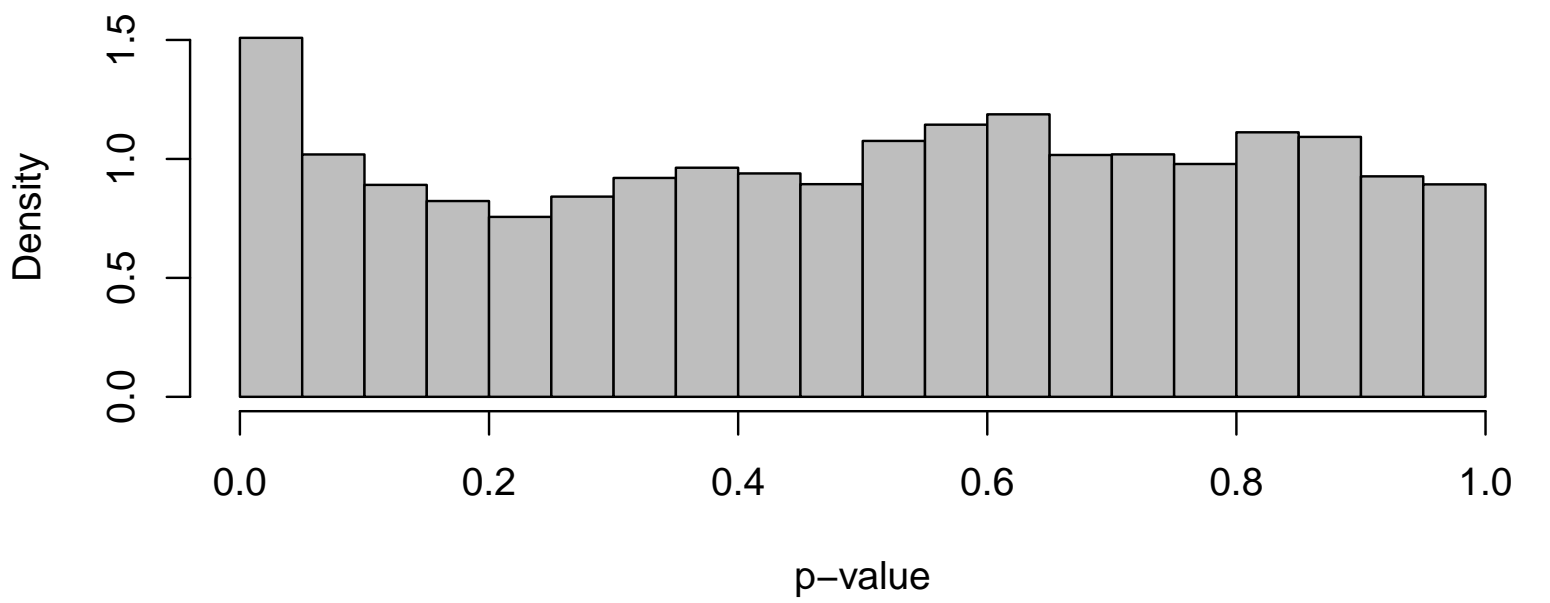

### FLK genome scan for group NEU

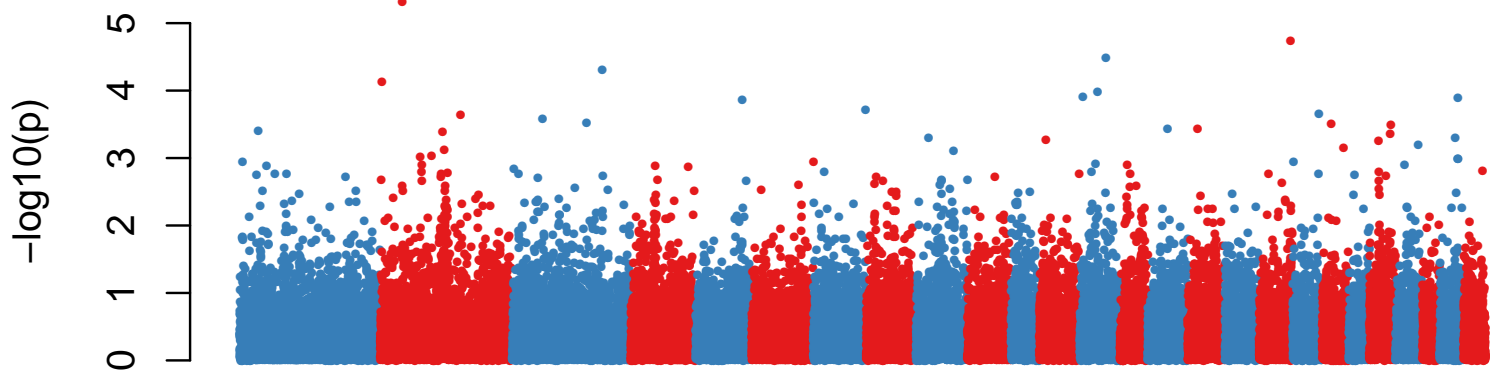

### hapFLK genome scan for group NEU

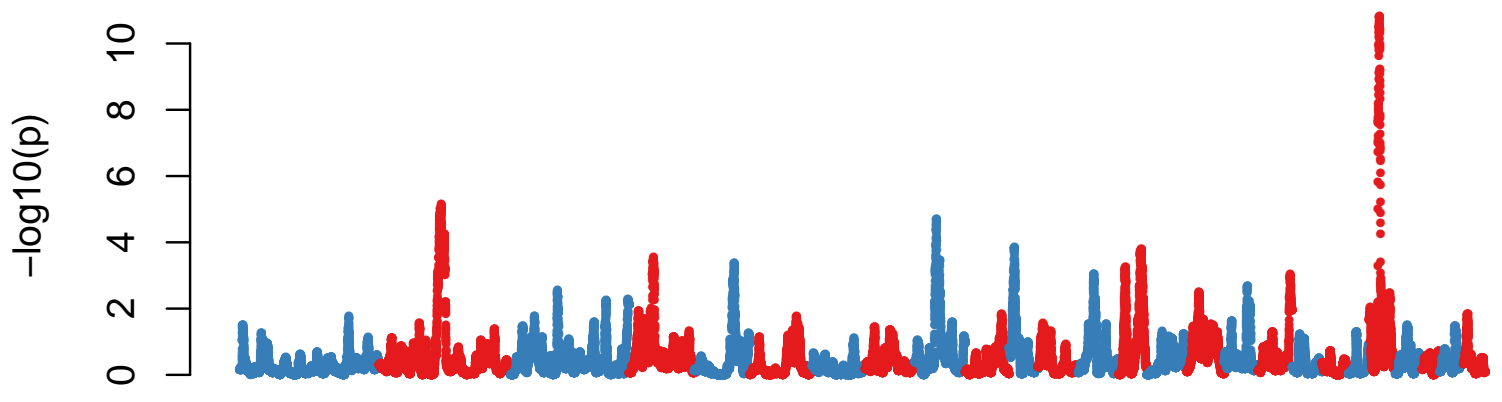

### FLK distribution for group SWA

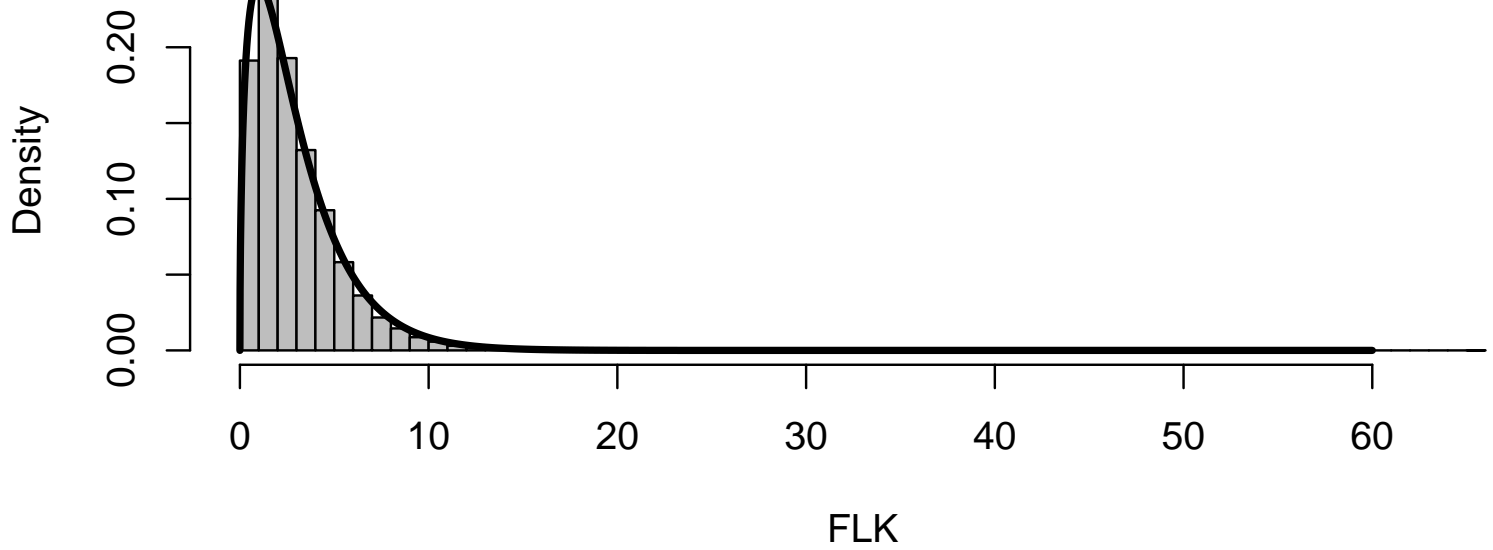

### P-value distribution for group SWA

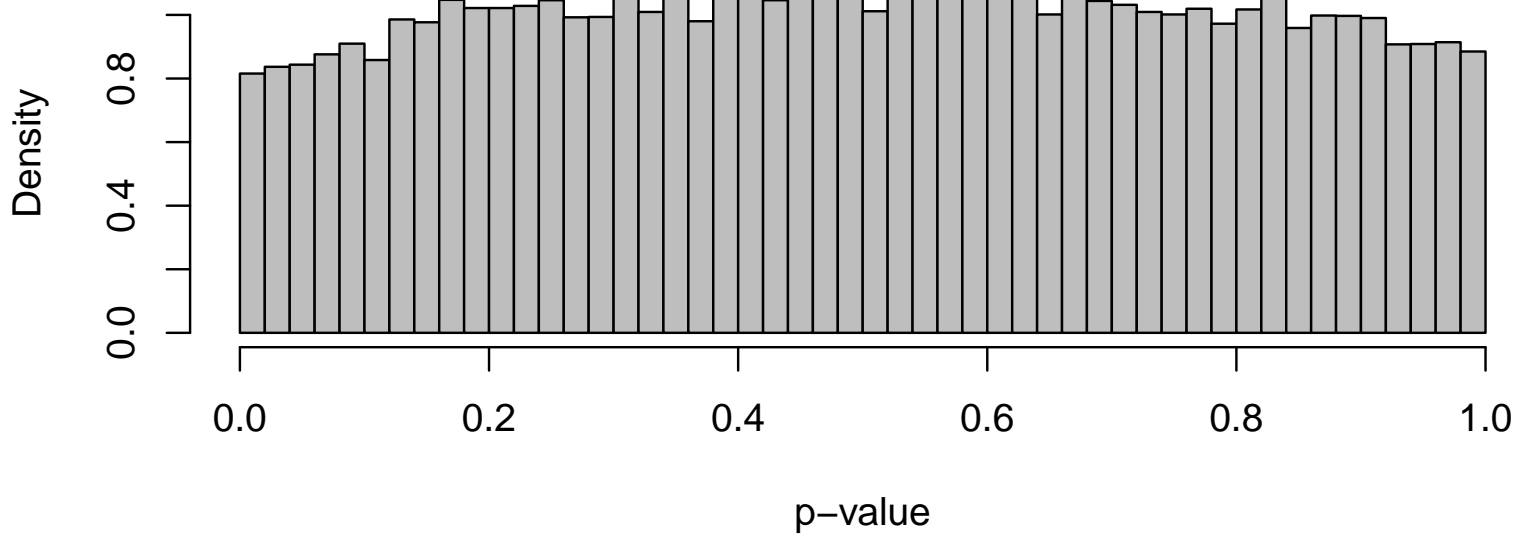

### hapFLK distribution for group SWA

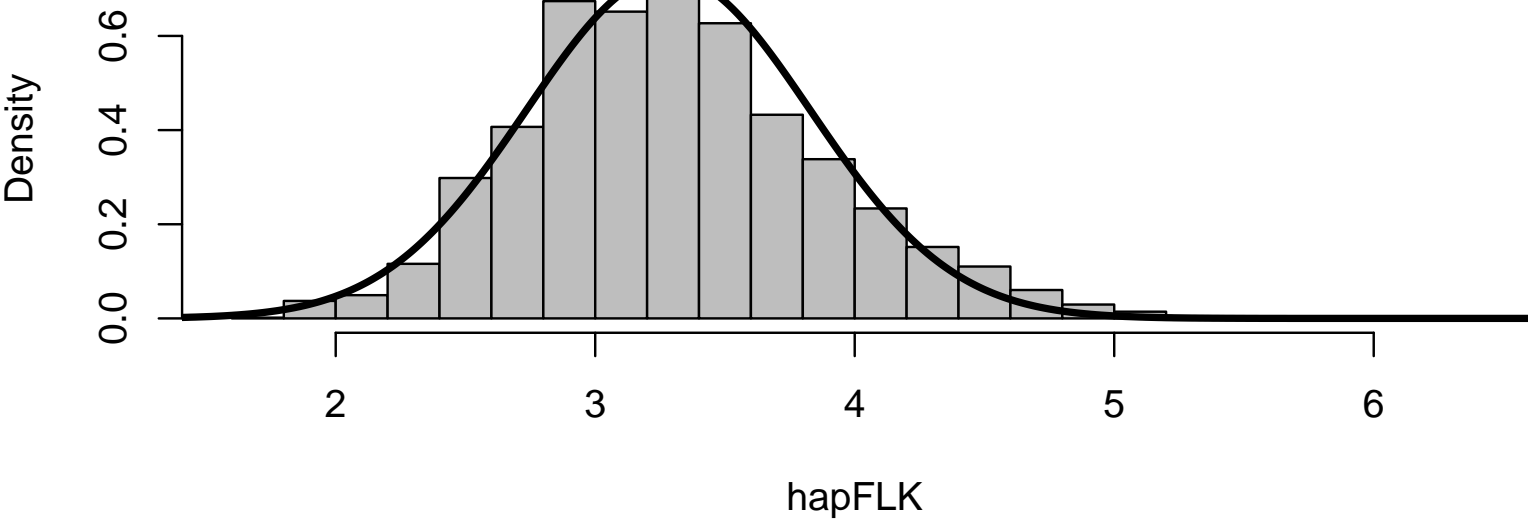

### P-value distribution for group SWA

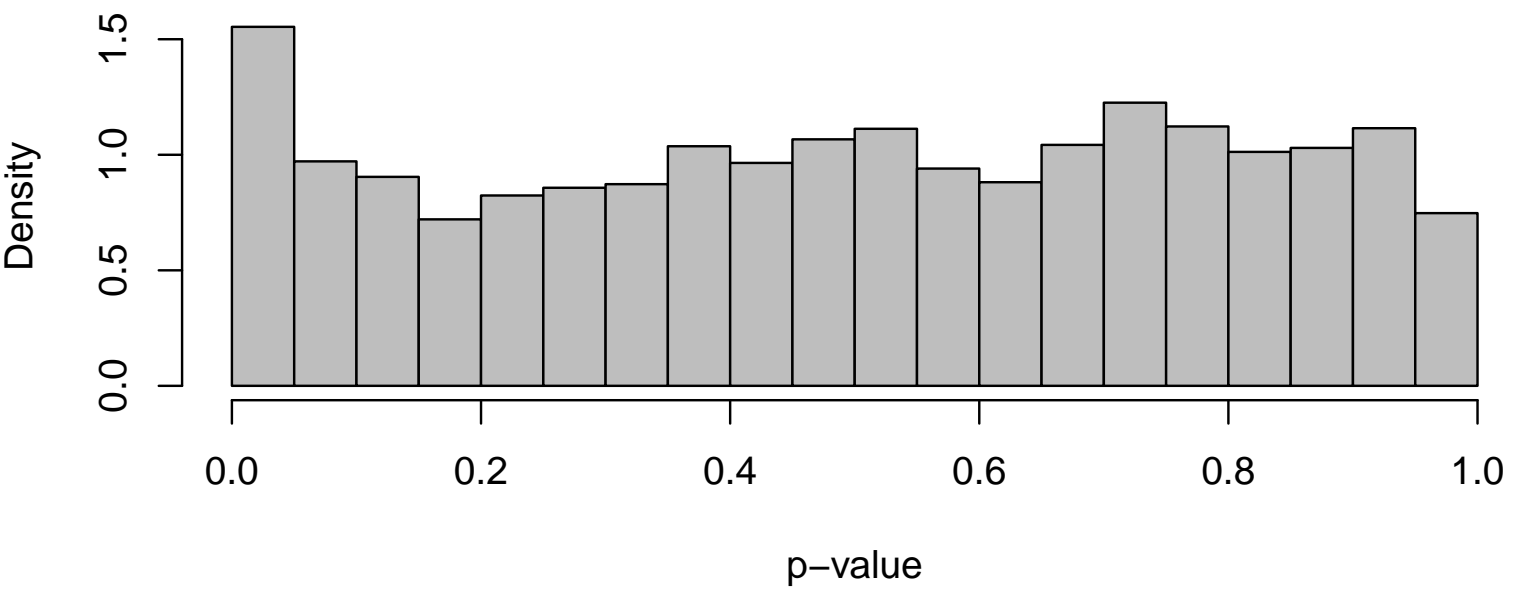

### FLK genome scan for group SWA

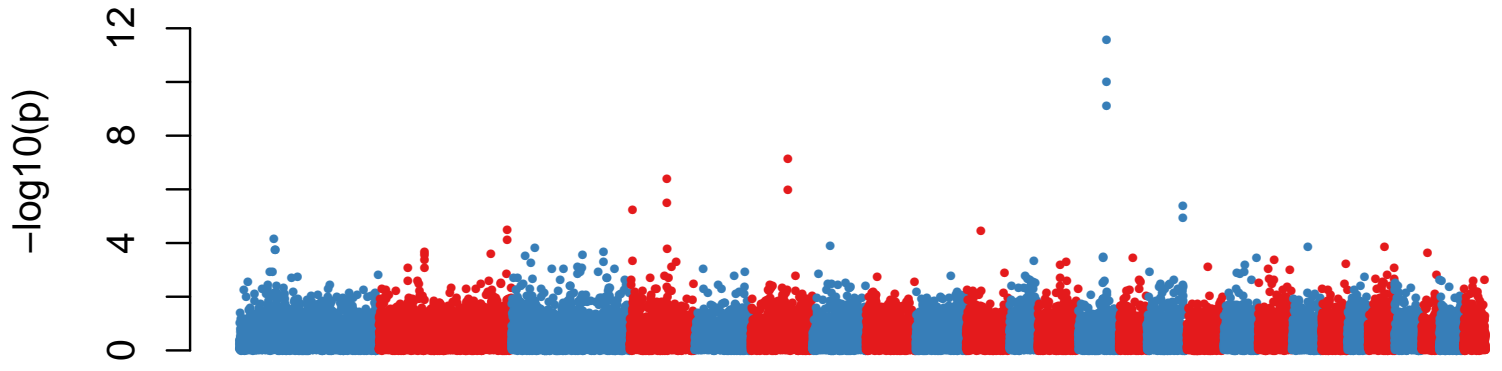

### hapFLK genome scan for group SWA

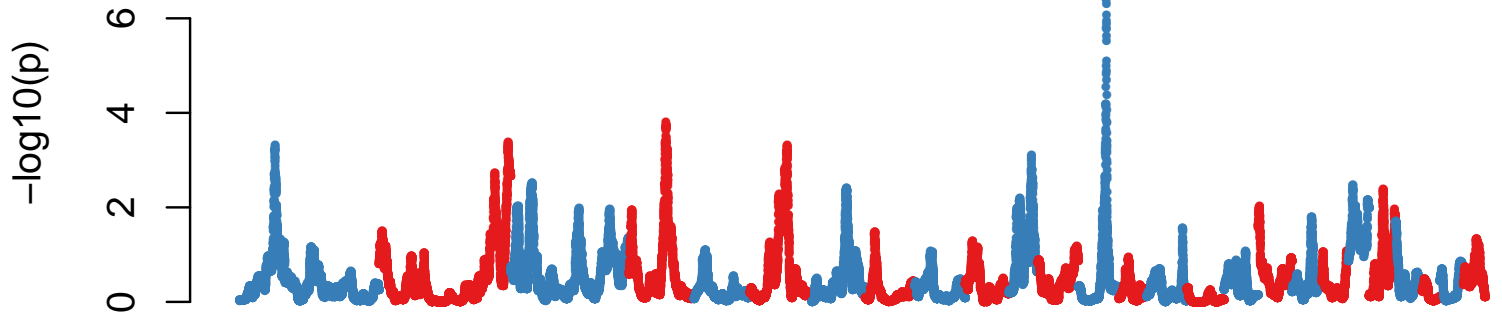

### FLK distribution for group SWE

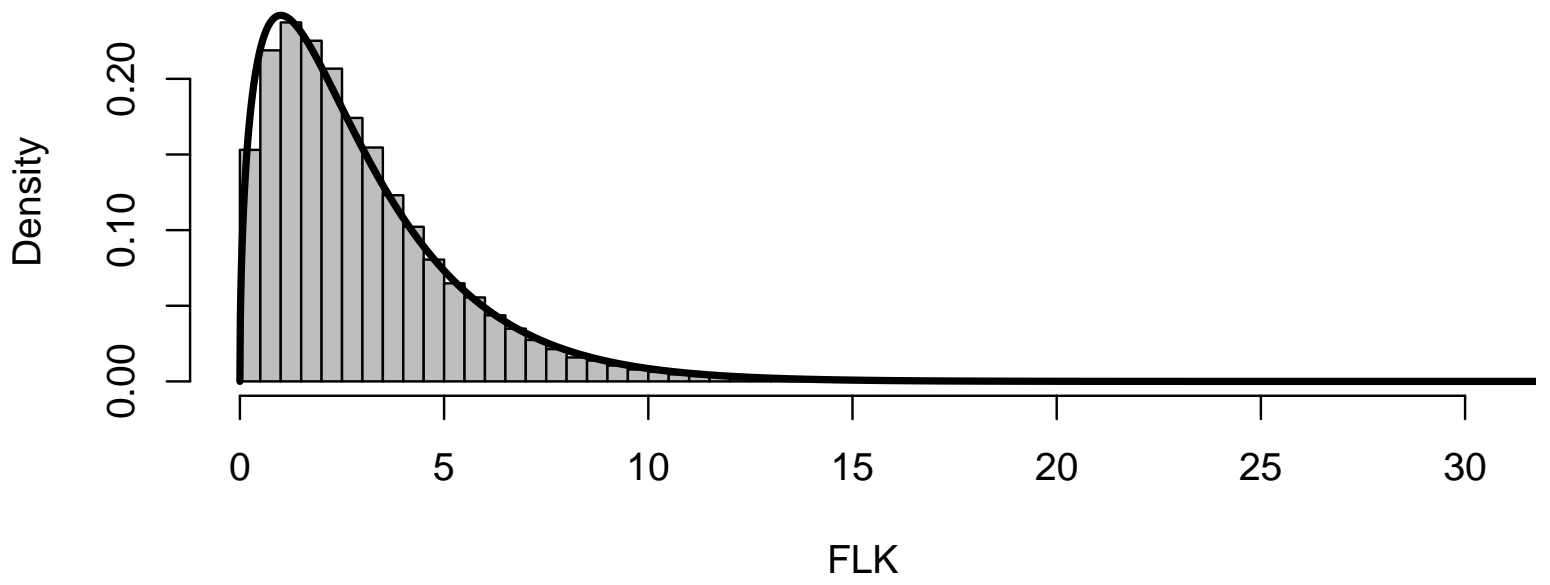

### P-value distribution for group SWE

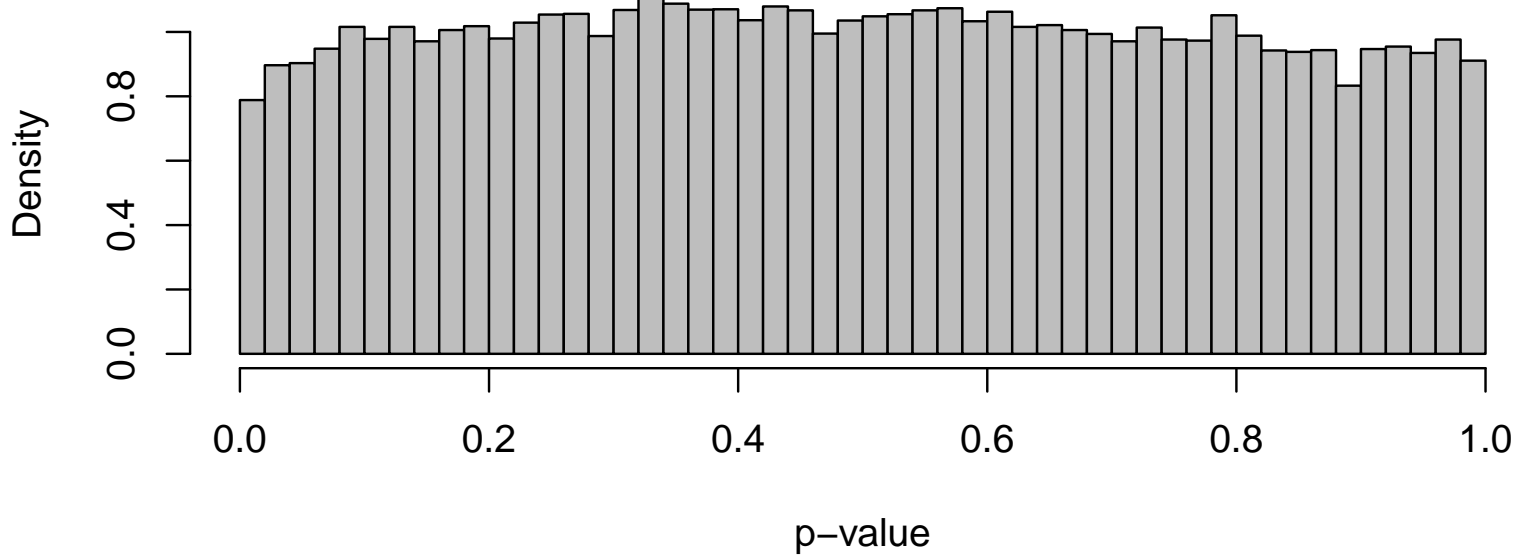

### hapFLK distribution for group SWE

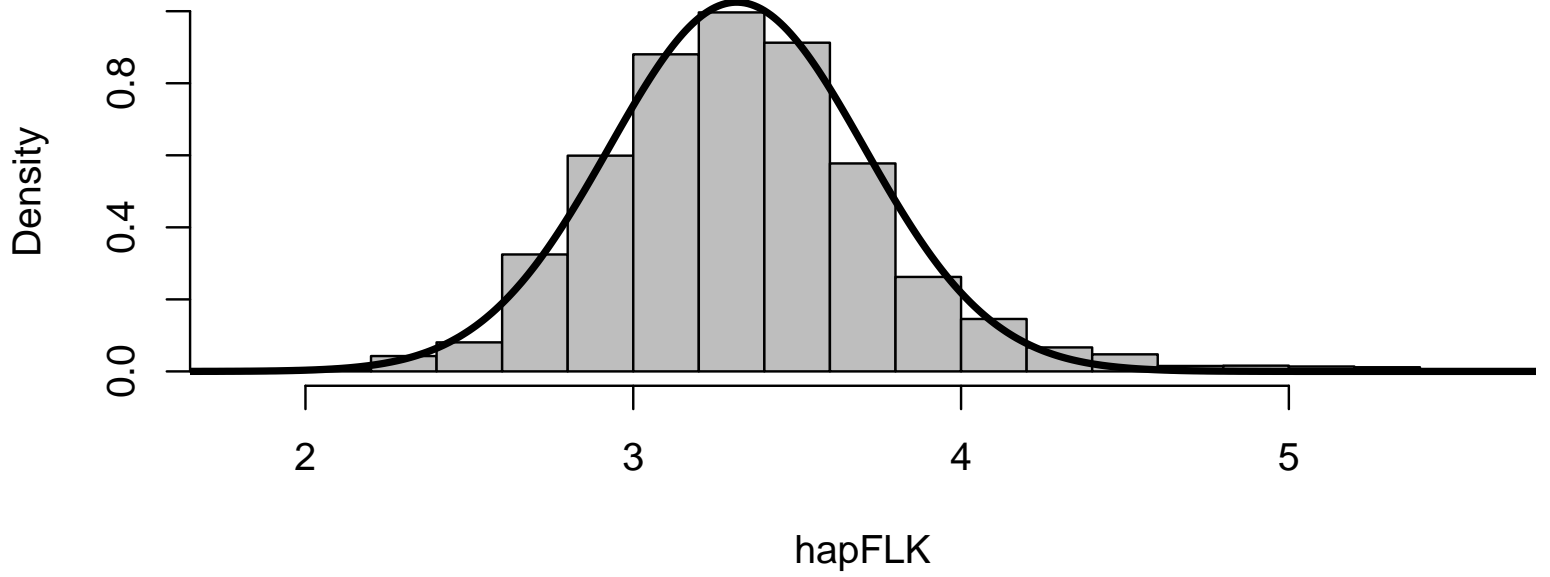

### P-value distribution for group SWE

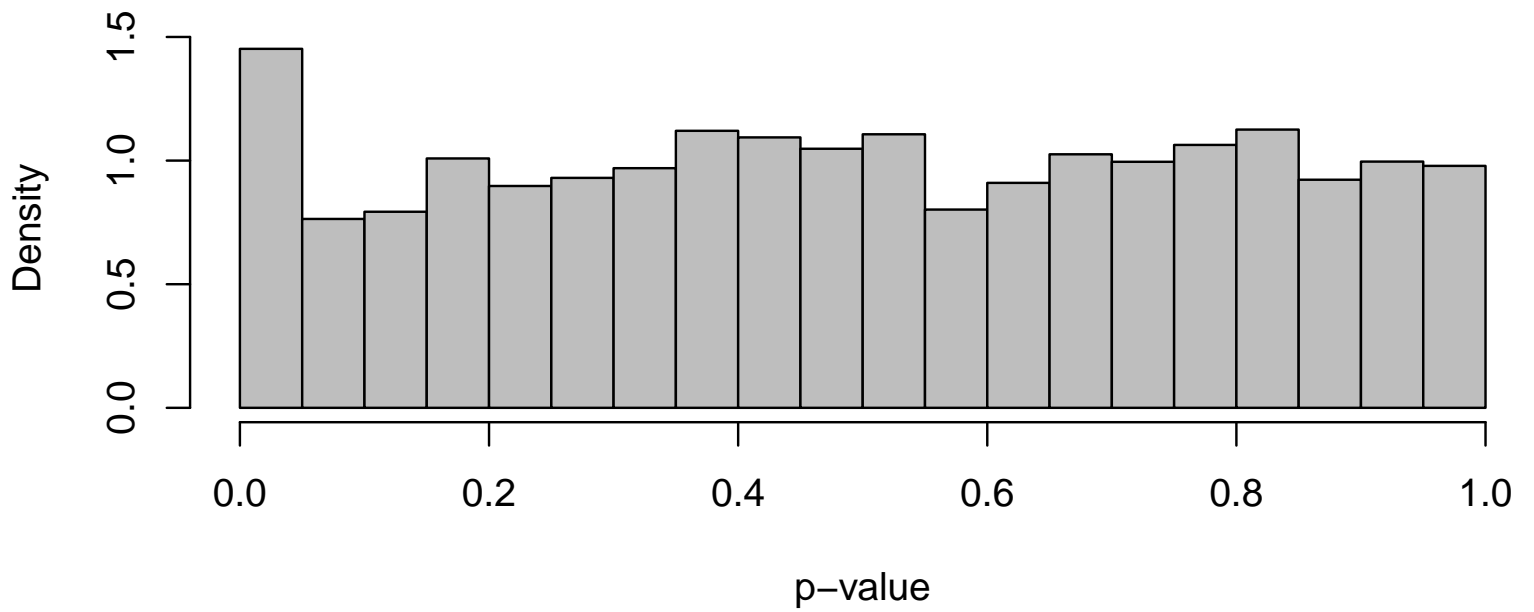



### FLK genome scan for group SWE

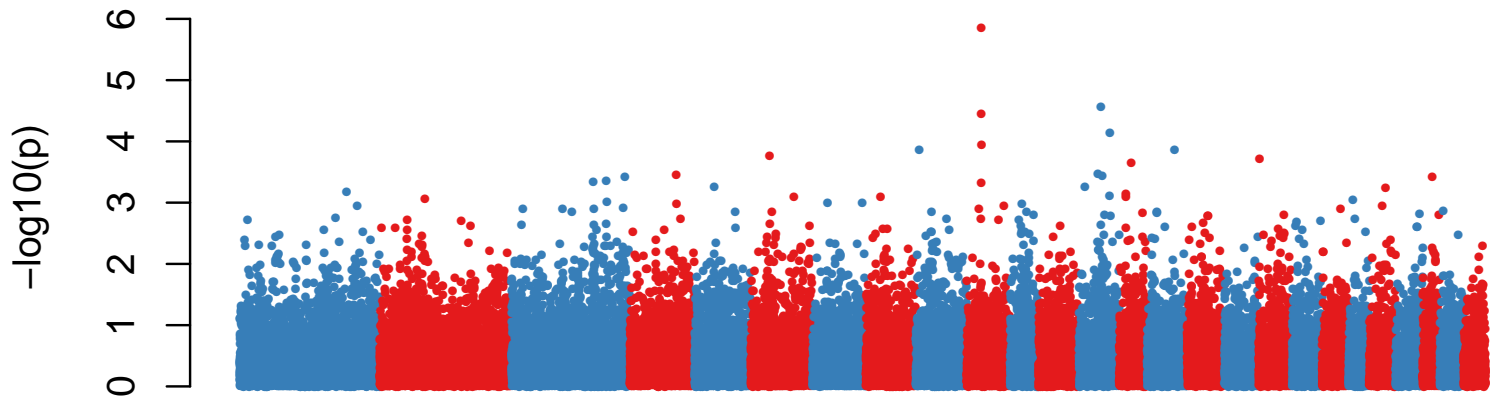

### hapFLK genome scan for group SWE

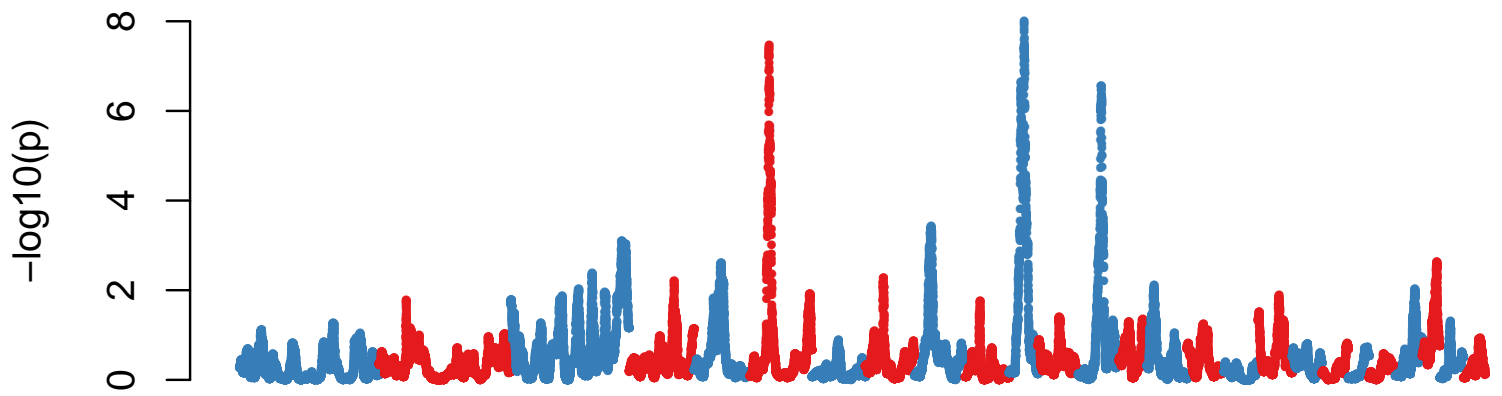

Supplement: pone.0103813.s003.pdf [file pone.0103813.s003.pdf]
